# Supplementary material for: Effects of removing boron from subphthalocyanines: a theoretical perspective
Source: Royal Society of Chemistry journal article supplement (doi:10.1039/d4dt03173c), 2025-01-01
Supplement: d4dt03173c1.pdf [file d4dt03173c1.pdf]

*Supplementary Information*

**Effects of Removing Boron from Subphthalocyanines: A Theoretical Perspective**

Jorge Labella,\* †<sup>[a]</sup> Jorge Labrador-Santiago, †<sup>[a]</sup> Daniel Holgado,<sup>[a]</sup> and Tomás Torres\*  
[a,b,c]

[a] Department of Organic Chemistry, Universidad Autónoma de Madrid, Campus de Cantoblanco. C/ Francisco Tomás y Valiente 7, 28049 Madrid (Spain)

[b] Institute for Advanced Research in Chemical Sciences (IAdChem), Universidad Autónoma de Madrid, Madrid (Spain).

[c] IMDEA – Nanociencia C/ Faraday 9, Campus de Cantoblanco, 28049 Madrid (Spain)

†These two authors contributed equally to this work

**Table of Content**

|                               |     |
|-------------------------------|-----|
| 1. TD-DFT calculations.....   | S2  |
| 2. Cartesian coordinates..... | S11 |

## 1. TD-DFT calculations

**Table S1.1.** Selected transition properties of **B-TdCl** calculated at CAM-B3LYP/cc-pVTZ level of theory. <sup>[a]</sup>Oscillator strength. <sup>[b]</sup>MOs involved in the transitions (H and L denoting HOMO and LUMO)

| Excited state | Energy (nm) | $f^{[a]}$  | Orbitals <sup>[b]</sup> (coefficient) |
|---------------|-------------|------------|---------------------------------------|
| S1            | 497         | 0.348<br>8 | H --> L (68%)                         |
| S2            | 497         | 0.348<br>8 | H --> L+1 (68%)                       |
| S10           | 266         | 0.162<br>2 | H-6 --> L (48%)                       |

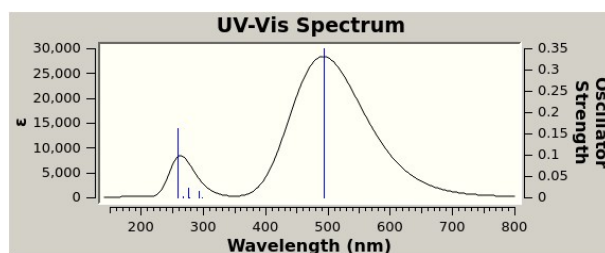

**Figure S1.1.** Calculated spectra of **B-TdCl** calculated at CAM-B3LYP/6-31+G(d,p) level of theory.

**Table S1.2.** Selected transition properties of **Al-TdCl** calculated at CAM-B3LYP/cc-pVTZ level of theory. <sup>[a]</sup>Oscillator strength. <sup>[b]</sup>MOs involved in the transitions (H and L denoting HOMO and LUMO)

| Excited state | Energy (nm) | $f^{[a]}$  | Orbitals <sup>[b]</sup> (coefficient) |
|---------------|-------------|------------|---------------------------------------|
| S1            | 514         | 0.291<br>2 | H --> L (67%)                         |
| S2            | 514         | 0.291<br>2 | H --> L+1 (67%)                       |
| S4            | 303         | 0.018<br>2 | H --> L+4 (52%)                       |
| S5            | 303         | 0.018<br>2 | H --> L+5 (52%)                       |
| S10           | 275         | 0.020<br>3 | H-8 --> L+1 (30%)                     |
|               |             |            | H-9 --> L+2 (30%)                     |
|               |             |            | H-5 --> L+2 (29%)                     |
|               |             |            | H-4 --> L (29%)                       |

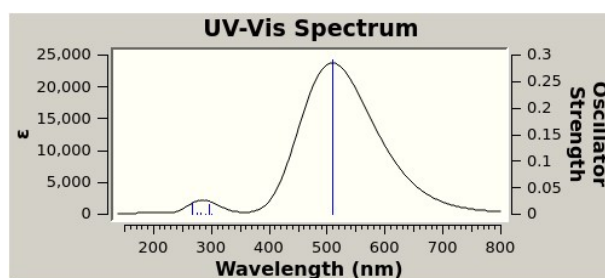

**Figure S1.2.** Calculated spectra of **Al-TdCl** calculated at CAM-B3LYP/6-31+G(d,p) level of theory.

**Table S1.3.** Selected transition properties of **Ga-TdCl** calculated at CAM-B3LYP/cc-pVTZ level of theory. <sup>[a]</sup>Oscillator strength. <sup>[b]</sup>MOs involved in the transitions (H and L denoting HOMO and LUMO)

| Excited state   | Energy (nm) | $f^{[a]}$ | Orbitals <sup>[b]</sup> (coefficient)                                                                              |
|-----------------|-------------|-----------|--------------------------------------------------------------------------------------------------------------------|
| S <sub>1</sub>  | 513         | 0.291     | H --> L (69%)                                                                                                      |
| S <sub>2</sub>  | 513         | 0.291     | H --> L+1 (69%)                                                                                                    |
| S <sub>4</sub>  | 303         | 0.016     | H-2 --> L (31%)<br>H-1 --> L+1 (31%)<br>H --> L+3 (47%)<br>H --> L+4 (19%)                                         |
| S <sub>5</sub>  | 303         | 0.016     | H-2 --> L+1 (31%)<br>H-1 --> L (31%)<br>H --> L+3 (47%)<br>H --> L+4 (19%)<br>H-9 --> L (17%)<br>H-9 --> L+1 (27%) |
| S <sub>10</sub> | 275         | 0.015     | H-8 --> L (27%)<br>H-8 --> L+1 (17%)<br>H-5 --> L+1 (28%)<br>H-4 --> L (28%)                                       |

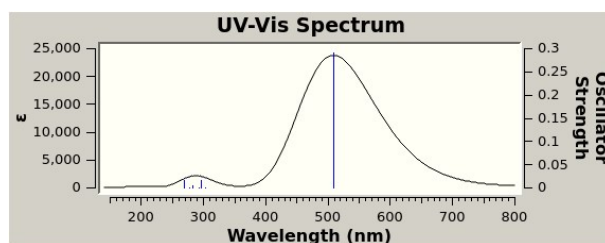

**Figure S1.3.** Calculated spectra of **Ga-TdCl** calculated at CAM-B3LYP/6-31+G(d,p) level of theory.

**Table S1.4.** Selected transition properties of **In-TdCl** calculated at CAM-B3LYP/cc-pVTZ level of theory. <sup>[a]</sup>Oscillator strength. <sup>[b]</sup>MOs involved in the transitions (H and L denoting HOMO and LUMO)

| Excited | Energy (nm) | $f^{[a]}$ | Orbitals <sup>[b]</sup> (coefficient) |
|---------|-------------|-----------|---------------------------------------|
|---------|-------------|-----------|---------------------------------------|

| state |     |            |                                                         |
|-------|-----|------------|---------------------------------------------------------|
| S1    | 518 | 0.278<br>4 | H --> L (69%)                                           |
| S2    | 518 | 0.278<br>4 | H --> L+1 (69%)                                         |
| S5    | 307 | 0.015<br>9 | H-2 --> L (28%)<br>H-1 --> (28%)<br>H --> L+3 (53%)     |
| S6    | 307 | 0.015<br>9 | H-2 --> L+1 (28%)<br>H-1 --> L (28%)<br>H --> L+4 (53%) |

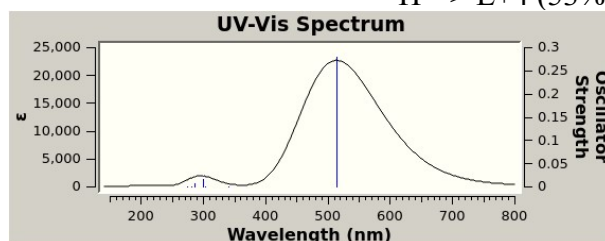

**Figure S1.4.** Calculated spectra of **In-TdCl** calculated at CAM-B3LYP/6-31+G(d,p) level of theory.

**Table S1.5.** Selected transition properties of **C-TdCl** calculated at CAM-B3LYP/cc-pVTZ level of theory. <sup>[a]</sup>Oscillator strength. <sup>[b]</sup>MOs involved in the transitions (H and L denoting HOMO and LUMO)

| Excited state | Energy (nm) | $f^{[a]}$  | Orbitals <sup>[b]</sup> (coefficient)                                                           |
|---------------|-------------|------------|-------------------------------------------------------------------------------------------------|
| S1            | 526         | 0.303<br>8 | H --> L (69%)                                                                                   |
| S2            | 526         | 0.303<br>8 | H --> L+1 (69%)                                                                                 |
| S4            | 313         | 0.057<br>7 | H-5 --> L+1 (28%)<br>H-4 --> L (28%)                                                            |
| S9            | 278         | 0.083<br>5 | H-3 --> L+1 (30%)<br>H-2 --> L (30%)<br>H-1 --> L+1 (34%)<br>H-5 --> L (28%)                    |
| S5            | 313         | 0.057<br>7 | H-4 --> L+1 (28%)<br>H-3 --> L (30%)<br>H-2 --> L+1 (30%)<br>H-1 --> L (34%)<br>H-5 --> L (28%) |
| S8            | 290         | 0.180<br>3 | H-4 --> L+1 (28%)<br>H-1 --> L (50%)<br>H --> L+4 (20%)<br>H-5 --> L+1 (28%)                    |
| S9            | 290         | 0.18       | H-4 --> L (28%)<br>H-1 --> L+1 (50%)<br>H --> L+3 (20%)                                         |

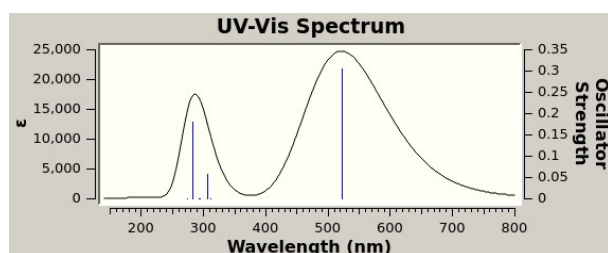

**Figure S1.5.** Calculated spectra of **C-TdCl** calculated at CAM-B3LYP/6-31+G(d,p) level of theory.

**Table S1.6.** Selected transition properties of **Sc-TdCl** calculated at CAM-B3LYP/cc-pVTZ level of theory. <sup>[a]</sup>Oscillator strength. <sup>[b]</sup>MOs involved in the transitions (H and L denoting HOMO and LUMO)

| Excited state | Energy (nm) | $f^{[a]}$ | Orbitals <sup>[b]</sup> (coefficient) |
|---------------|-------------|-----------|---------------------------------------|
| S1            | 529         | 0.245     | H --> L (67%)                         |
| S2            | 529         | 0.245     | H --> L+1 (67%)                       |
| S4            | 397         | 0.040     | H --> L+2 (68%)                       |
| S5            | 397         | 0.040     | H --> L+3 (68%)                       |

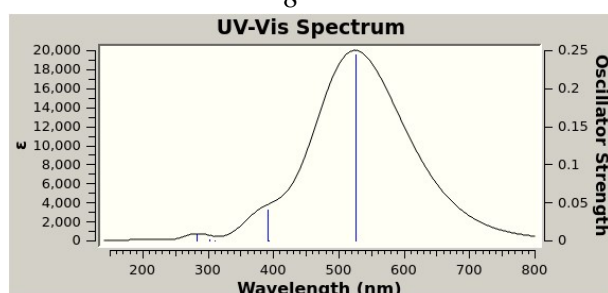

**Figure S1.6.** Calculated spectra of **Sc-TdCl** calculated at CAM-B3LYP/6-31+G(d,p) level of theory.

**Table S1.7.** Selected transition properties of **P-Td=O** calculated at CAM-B3LYP/cc-pVTZ level of theory. <sup>[a]</sup>Oscillator strength. <sup>[b]</sup>MOs involved in the transitions (H and L denoting HOMO and LUMO)

| Excited state | Energy (nm) | $f^{[a]}$ | Orbitals <sup>[b]</sup> (coefficient)                   |
|---------------|-------------|-----------|---------------------------------------------------------|
| S1            | 546         | 0.254     | H --> L (69%)                                           |
| S2            | 546         | 0.254     | H --> L+1 (69%)                                         |
| S7            | 299         | 0.236     | H-1 --> L (52%)                                         |
| S8            | 299         | 0.236     | H-1 --> L+1 (52%)                                       |
| S10           | 288         | 0.457     | H-3 --> L+1 (40%)<br>H-2 --> L (40%)<br>H-1 --> L (22%) |

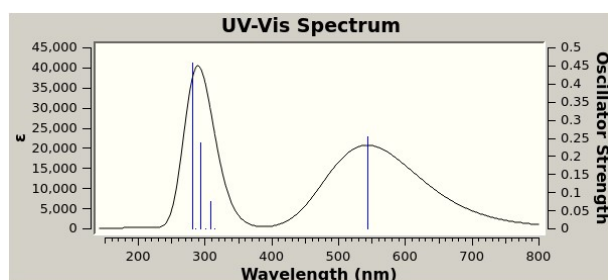

**Figure S1.7.** Calculated spectra of **P-Td=O** calculated at CAM-B3LYP/6-31+G(d,p) level of theory.

**Table S1.8.** Selected transition properties of **P-Td** calculated at CAM-B3LYP/cc-pVTZ level of theory. <sup>[a]</sup>Oscillator strength. <sup>[b]</sup>MOs involved in the transitions (H and L denoting HOMO and LUMO)

| Excited state | Energy (nm) | $f^{[a]}$ | Orbitals <sup>[b]</sup> (coefficient) |
|---------------|-------------|-----------|---------------------------------------|
| S1            | 563         | 0.225     | H --> L (59%)                         |
|               |             |           | H --> L+1 (35%)                       |
| S2            | 563         | 0.225     | H --> L (35%)                         |
|               |             |           | H --> L+1 (59%)                       |
| S9            | 300         | 0.027     | H-6 --> L (38%)                       |
|               |             |           | 8                                     |
| S10           | 300         | 0.027     | H-6 --> L+1 (28%)                     |
|               |             |           | 6                                     |

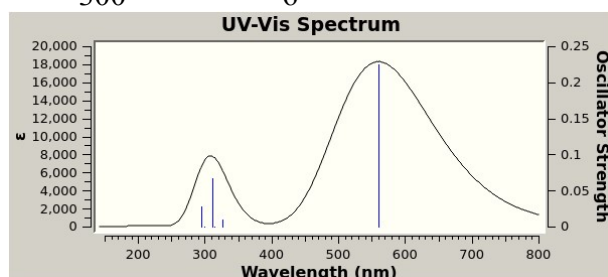

**Figure S1.8.** Calculated spectra of **P-Td** calculated at CAM-B3LYP/6-31+G(d,p) level of theory.

**Table S1.9.** Selected transition properties of **H<sub>2</sub>-Td** calculated at CAM-B3LYP/cc-pVTZ level of theory. <sup>[a]</sup>Oscillator strength. <sup>[b]</sup>MOs involved in the transitions (H and L denoting HOMO and LUMO)

| Excited state | Energy (nm) | $f^{[a]}$ | Orbitals <sup>[b]</sup> (coefficient) |
|---------------|-------------|-----------|---------------------------------------|
| S1            | 514         | 0.305     | H --> L (67%)                         |
| S2            | 500         | 0.329     | H --> L+1 (67%)                       |
|               |             |           | 0                                     |
| S4            | 307         | 0.056     | H --> L+2 (64%)                       |
|               |             |           | 6                                     |
| S9            | 278         | 0.083     | H-3 --> L+1 (28%)                     |
|               |             |           | 5                                     |

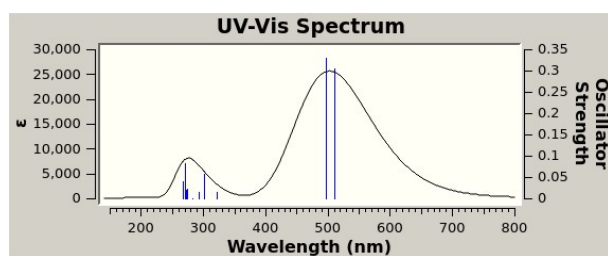

**Figure S1.9.** Calculated spectra of  $\text{H}_2\text{-Td}$  calculated at CAM-B3LYP/6-31+G(d,p) level of theory.

**Table S1.10.** Selected transition properties of  $\text{H}^-\text{Td}$  calculated at CAM-B3LYP/cc-pVTZ level of theory. <sup>[a]</sup>Oscillator strength. <sup>[b]</sup>MOs involved in the transitions (H and L denoting HOMO and LUMO)

| Excited state | Energy (nm) | $f^{\text{[a]}}$ | Orbitals <sup>[b]</sup> (coefficient) |
|---------------|-------------|------------------|---------------------------------------|
| S1            | 496         | 0.398            | H --> L (68%)                         |
| S2            | 485         | 0.335            | H --> L+1 (68%)                       |
| S8            | 297         | 0.148            | H-5 --> L (13%)                       |
|               |             |                  | H-4 --> L+1 (23%)                     |
|               |             |                  | H-3 --> L (20%)                       |
|               |             |                  | H-2 --> L (57%)                       |
|               |             |                  | H-1 --> L+1 (11%)                     |
| S9            | 295         | 0.160            | H --> L+1 (10%)                       |
|               |             |                  | H-4 --> L (26%)                       |
|               |             |                  | H-2 --> L+1 (55%)                     |

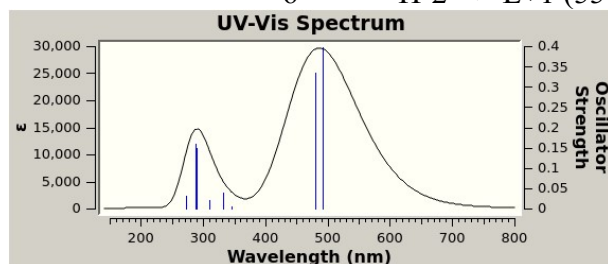

**Figure S1.10.** Calculated spectra of  $\text{H}^-\text{Td}$  calculated at CAM-B3LYP/6-31+G(d,p) level of theory.

**Table S1.11.** Selected transition properties of  $2^-\text{Td}$  calculated at CAM-B3LYP/cc-pVTZ level of theory. <sup>[a]</sup>Oscillator strength. <sup>[b]</sup>MOs involved in the transitions (H and L denoting HOMO and LUMO)

| Excited state | Energy (nm) | $f^{\text{[a]}}$ | Orbitals <sup>[b]</sup> (coefficient) |
|---------------|-------------|------------------|---------------------------------------|
| S7            | 451         | 0.072            | H -11--> L (37%)                      |
|               |             |                  | H-10 --> L (33%)                      |
|               |             |                  | H-7 --> L (46%)                       |
| S8            | 451         | 0.072            | H -11--> L (33%)                      |
|               |             |                  | H-10 --> L (37%)                      |

|     |     |       |                  |
|-----|-----|-------|------------------|
|     |     |       | H-8 --> L (46%)  |
|     |     |       | H -11--> L (29%) |
| S10 | 364 | 0.281 | H-10 --> L (34%) |
|     |     | 8     | H-8 --> L (49%)  |

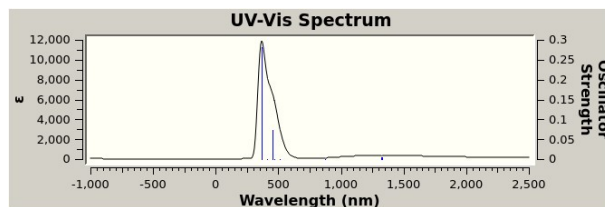

**Figure S1.11.** Calculated spectra of  $2^-$ -Td calculated at CAM-B3LYP/6-31+G(d,p) level of theory.

**Table S1.12.** Selected transition properties of Si-Oc calculated at CAM-B3LYP/cc-pVTZ level of theory. <sup>[a]</sup>Oscillator strength. <sup>[b]</sup>MOs involved in the transitions (H and L denoting HOMO and LUMO)

| Excited state | Energy (nm) | $f^{[a]}$ | Orbitals <sup>[b]</sup> (coefficient) |
|---------------|-------------|-----------|---------------------------------------|
| S3            | 507         | 0.429     | H --> L+2 (62%)                       |
|               |             |           | H-1 --> L (26%)                       |
|               |             |           | H --> L+3 (16%)                       |
| S4            | 508         | 0.429     | H --> L+3 (62%)                       |
|               |             |           | H-1 --> L+1 (26%)                     |
|               |             |           | H --> L+2 (16%)                       |
| S5            | 457         | 0.071     | H-1 --> L (64%)                       |
|               |             |           | H --> L+2 (27%)                       |
| S6            | 457         | 0.071     | H-1 --> L+1 (64%)                     |
|               |             |           | H --> L+3 (27%)                       |

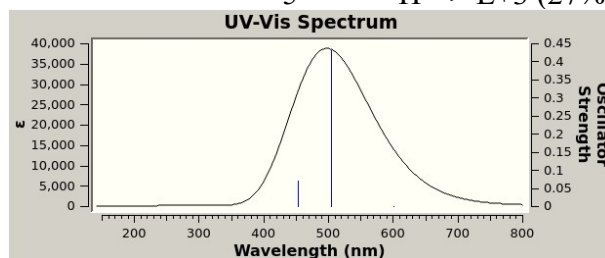

**Figure S1.12.** Calculated spectra of Si-Oc calculated at CAM-B3LYP/6-31+G(d,p) level of theory.

**Table S1.13.** Selected transition properties of Ge-Td calculated at CAM-B3LYP/cc-pVTZ level of theory. <sup>[a]</sup>Oscillator strength. <sup>[b]</sup>MOs involved in the transitions (H and L denoting HOMO and LUMO)

| Excited state | Energy (nm) | $f^{[a]}$ | Orbitals <sup>[b]</sup> (coefficient) |
|---------------|-------------|-----------|---------------------------------------|
| S3            | 505         | 0.456     | H-1 --> L (34%)                       |
|               |             |           | H --> L+2 (60%)                       |
| S4            | 505         | 0.456     | H-1 --> L+1 (34%)                     |
|               |             |           | H --> L+3 (60%)                       |
| S5            | 450         | 0.037     | H-1 --> L (61%)                       |
|               |             |           | H --> L+2 (35%)                       |



|    |     |       |                   |
|----|-----|-------|-------------------|
| S6 | 450 | 0.037 | H-1 --> L+1 (61%) |
|    |     | 5     | H --> L+3 (35%)   |

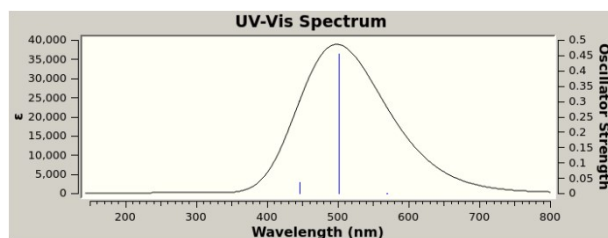

**Figure S1.13.** Calculated spectra of **Ge-Oc** calculated at CAM-B3LYP/6-31+G(d,p) level of theory.

**Table S1.14.** Selected transition properties of **Sn-Td** calculated at CAM-B3LYP/cc-pVTZ level of theory. <sup>[a]</sup>Oscillator strength. <sup>[b]</sup>MOs involved in the transitions (H and L denoting HOMO and LUMO)

| Excited state | Energy (nm) | $f^{[a]}$ | Orbitals <sup>[b]</sup> (coefficient) |
|---------------|-------------|-----------|---------------------------------------|
| S3            | 508         | 0.472     | H-1 --> L (41%)                       |
|               |             | 9         | H --> L+2 (55%)                       |
| S4            | 508         | 0.429     | H-1 --> L+1 (41%)                     |
|               |             | 9         | H --> L+3 (55%)                       |
| S5            | 435         | 0.012     | H-1 --> L (56%)                       |
|               |             | 5         | H --> L+2 (42%)                       |
| S6            | 435         | 0.012     | H-1 --> L+1 (56%)                     |
|               |             | 5         | H --> L+3 (42%)                       |

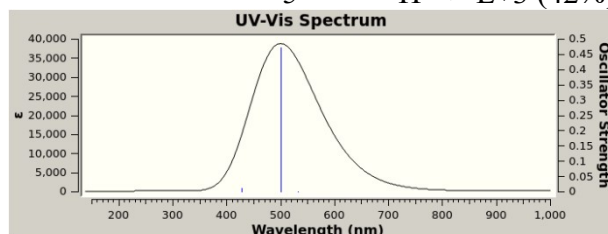

**Figure S1.14.** Calculated spectra of **Sn-Oc** calculated at CAM-B3LYP/6-31+G(d,p) level of theory.

**Table S1.15.** Selected transition properties of **Pb-Td** calculated at CAM-B3LYP/cc-pVTZ level of theory. <sup>[a]</sup>Oscillator strength. <sup>[b]</sup>MOs involved in the transitions (H and L denoting HOMO and LUMO)

| Excited state | Energy (nm) | $f^{[a]}$ | Orbitals <sup>[b]</sup> (coefficient) |
|---------------|-------------|-----------|---------------------------------------|
| S3            | 509         | 0.468     | H-1 --> L (41%)                       |
|               |             | 1         | H --> L+2 (54%)                       |
| S4            | 509         | 0.468     | H-1 --> L+1 (42%)                     |
|               |             | 1         | H --> L+3 (54%)                       |

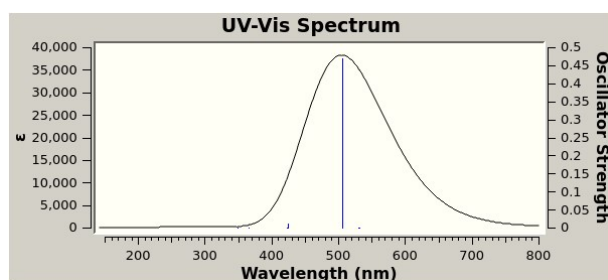

**Figure S1.15.** Calculated spectra of **Pb-Oc** calculated at CAM-B3LYP/6-31+G(d,p) level of theory.

**Table S1.16.** Selected transition properties of **Ti-Oc** calculated at CAM-B3LYP/cc-pVTZ level of theory. <sup>[a]</sup>Oscillator strength. <sup>[b]</sup>MOs involved in the transitions (H and L denoting HOMO and LUMO)

| Excited state | Energy (nm) | $f^{[a]}$ | Orbitals <sup>[b]</sup> (coefficient) |
|---------------|-------------|-----------|---------------------------------------|
| S3            | 866         | 0.018     | H-1 --> L (68%)                       |
|               |             | 7         | H-1 --> L+6 (18%)                     |
| S4            | 864         | 0.018     | H-1 --> L+1 (68%)                     |
|               |             | 8         | H --> L+5 (18%)                       |

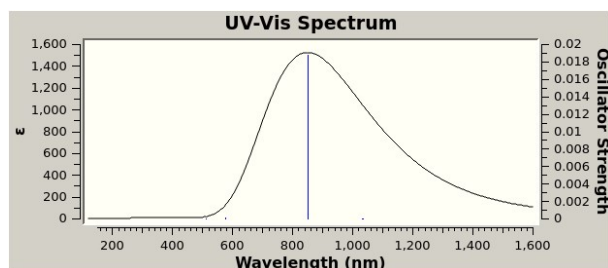

**Figure S1. 16.** Calculated spectra of **Ti-Oc** calculated at CAM-B3LYP/6-31+G(d,p) level of theory.

**Table S1.17.** Selected transition properties of **Zn-Oc** calculated at CAM-B3LYP/cc-pVTZ level of theory. <sup>[a]</sup>Oscillator strength. <sup>[b]</sup>MOs involved in the transitions (H and L denoting HOMO and LUMO)

| Excited state | Energy (nm) | $f^{[a]}$ | Orbitals <sup>[b]</sup> (coefficient) |                   |
|---------------|-------------|-----------|---------------------------------------|-------------------|
| S2            | 508         | 0.285     | H --> L+1 (68%)                       |                   |
| S3            | 508         | 0.292     | H --> L+2 (68%)                       |                   |
|               |             | 2         |                                       |                   |
| S7            | 310         | 0.017     | H --> L+5 (60%)                       |                   |
|               |             | 4         |                                       |                   |
| S8            | 310         | 0.011     | H --> L+6 (56%)                       |                   |
|               |             | 9         | H-6 --> L+2 (19%)                     |                   |
| S9            | 296         | 0.026     | H-2 --> L+2 (36%)                     |                   |
|               |             |           | 3                                     | H-1 --> L+1 (37%) |
|               |             |           |                                       | H --> L+6 (41%)   |
| S10           | 296         | 0.019     | H-6 --> L+1 (21%)                     |                   |

H-2 --> L+1 (41%)  
H-1 --> L+2 (35%)  
H --> L+6 (35%)

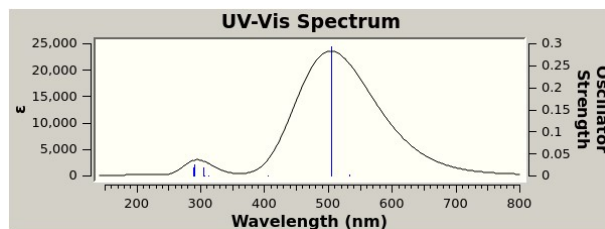

**Figure S1.17.** Calculated spectra of **Zn-Oc** calculated at CAM-B3LYP/6-31+G(d,p) level of theory.

## 2. Cartesian coordinates

### B-TdCl

| Atom | Coordinates (Angstroms) |           |           |
|------|-------------------------|-----------|-----------|
|      | X                       | Y         | Z         |
| N    | -2.086132               | -1.665681 | 0.190288  |
| C    | -2.267192               | -0.343076 | 0.324145  |
| C    | -0.836421               | -2.135000 | 0.324307  |
| N    | 0.203999                | -1.348141 | 0.743588  |
| N    | -1.269535               | 0.497391  | 0.743312  |
| C    | 1.430691                | -1.791941 | 0.324429  |
| N    | 2.485605                | -0.973876 | 0.190514  |
| C    | 2.267218                | 0.343085  | 0.324304  |
| N    | 1.065478                | 0.850721  | 0.743283  |
| C    | -1.430733               | 1.791808  | 0.323916  |
| N    | -0.399421               | 2.639413  | 0.189902  |
| C    | 0.836500                | 2.134901  | 0.323927  |
| C    | -3.309358               | 0.527740  | -0.202905 |
| C    | -2.787115               | 1.860639  | -0.203053 |
| C    | -0.217857               | -3.344044 | -0.202757 |
| C    | 1.197585                | -3.129850 | -0.202705 |
| C    | 2.111778                | 2.601933  | -0.203096 |
| C    | 3.005031                | 1.483242  | -0.202868 |
| C    | -4.572499               | 0.260298  | -0.735587 |
| C    | -5.314178               | 1.325812  | -1.237732 |
| C    | -4.800537               | 2.636751  | -1.237871 |
| C    | -3.532389               | 2.914892  | -0.735883 |
| C    | -0.758260               | -4.516501 | -0.735768 |

|    |           |           |           |
|----|-----------|-----------|-----------|
| C  | 0.116644  | -5.475540 | -1.238103 |
| C  | 1.508766  | -5.264871 | -1.238065 |
| C  | 2.060719  | -4.089919 | -0.735685 |
| C  | 2.511741  | 3.829477  | -0.735960 |
| C  | 3.805385  | 3.938988  | -1.238002 |
| C  | 4.683916  | 2.838733  | -1.237808 |
| C  | 4.290739  | 1.601506  | -0.735566 |
| H  | -6.305615 | 1.144594  | -1.641462 |
| H  | -4.959654 | -0.753082 | -0.749777 |
| H  | -5.405002 | 3.443175  | -1.641711 |
| H  | -3.128051 | 3.921537  | -0.750305 |
| H  | 1.827642  | 4.671398  | -0.750436 |
| H  | 4.144161  | 4.888128  | -1.641918 |
| H  | 5.684566  | 2.958956  | -1.641578 |
| H  | 4.960403  | 0.748055  | -0.749744 |
| H  | 3.131900  | -3.918468 | -0.750003 |
| H  | 2.161395  | -6.032745 | -1.642083 |
| H  | -0.279543 | -6.402128 | -1.642151 |
| H  | -1.832210 | -4.669657 | -0.750145 |
| Cl | -0.000049 | 0.000389  | 3.219354  |
| B  | -0.000035 | 0.000089  | 1.340480  |

#### Al-TdCl

| Atom | Coordinates (Angstroms) |           |           |
|------|-------------------------|-----------|-----------|
|      | X                       | Y         | Z         |
| N    | 0.472375                | -2.585269 | 0.246719  |
| C    | -0.793771               | -2.168827 | 0.416226  |
| C    | 1.509505                | -1.748024 | 0.416035  |
| N    | 1.420813                | -0.507208 | 1.013294  |
| N    | -1.149668               | -0.976948 | 1.013708  |
| C    | 2.275196                | 0.397066  | 0.416226  |
| N    | 2.002714                | 1.701830  | 0.247026  |
| C    | 0.759023                | 2.181275  | 0.416446  |
| N    | -0.271171               | 1.484039  | 1.013766  |
| C    | -2.268753               | -0.433259 | 0.416778  |
| N    | -2.475333               | 0.883552  | 0.247607  |
| C    | -1.481545               | 1.771853  | 0.416764  |
| C    | -1.958876               | -2.601159 | -0.348622 |
| C    | -2.883507               | -1.513078 | -0.348404 |
| C    | 2.752144                | -1.740385 | -0.348984 |
| C    | 3.232122                | -0.395588 | -0.348877 |
| C    | -1.273580               | 2.996894  | -0.348348 |
| C    | 0.131034                | 3.253632  | -0.348453 |
| C    | -2.211082               | -3.748033 | -1.106372 |
| C    | -3.402704               | -3.815372 | -1.821338 |
| C    | -4.315004               | -2.741765 | -1.821158 |
| C    | -4.056151               | -1.576762 | -1.105995 |
| C    | 3.393659                | -2.723888 | -1.106805 |
| C    | 4.531967                | -2.365340 | -1.821928 |
| C    | 5.005533                | -1.038451 | -1.821812 |
| C    | 4.351394                | -0.040340 | -1.106559 |
| C    | -2.140854               | 3.788649  | -1.106014 |
| C    | -1.603500               | 4.854197  | -1.821234 |

|    |           |           |           |
|----|-----------|-----------|-----------|
| C  | -0.217591 | 5.107527  | -1.821333 |
| C  | 0.662054  | 4.300972  | -1.106222 |
| H  | -3.632732 | -4.706558 | -2.397462 |
| H  | -1.493601 | -4.561608 | -1.126213 |
| H  | -5.231747 | -2.824866 | -2.397107 |
| H  | -4.743356 | -0.737449 | -1.125465 |
| H  | -3.204182 | 3.574117  | -1.125572 |
| H  | -2.260399 | 5.498918  | -2.397311 |
| H  | 0.168677  | 5.942906  | -2.397510 |
| H  | 1.732523  | 4.476426  | -1.125969 |
| H  | 4.697228  | 0.987810  | -1.126121 |
| H  | 5.892320  | -0.791900 | -2.397890 |
| H  | 5.062286  | -3.117544 | -2.398119 |
| H  | 3.010407  | -3.738680 | -1.126564 |
| Cl | 0.001294  | -0.000620 | 4.165875  |
| Al | 0.000167  | -0.000136 | 2.062037  |

### Ga-TdCl

| Atom | Coordinates (Angstroms) |           |           |
|------|-------------------------|-----------|-----------|
|      | X                       | Y         | Z         |
| N    | -0.332053               | -2.609827 | 0.098770  |
| C    | -1.413206               | -1.827420 | 0.260023  |
| C    | 0.910628                | -2.123132 | 0.259902  |
| N    | 1.209561                | -0.919854 | 0.855925  |
| N    | -1.401392               | -0.587653 | 0.856140  |
| C    | 2.289332                | -0.310046 | 0.260292  |
| N    | 2.426267                | 1.017538  | 0.099506  |
| C    | 1.383413                | 1.850304  | 0.260757  |
| N    | 0.191819                | 1.507492  | 0.856686  |
| C    | -2.294106               | 0.273113  | 0.260574  |
| N    | -2.094280               | 1.592700  | 0.099835  |
| C    | -0.876110               | 2.137789  | 0.260998  |
| C    | -2.650619               | -1.885548 | -0.511683 |
| C    | -3.202865               | -0.568439 | -0.511554 |
| C    | 2.093949                | -2.489143 | -0.512087 |
| C    | 2.958346                | -1.352243 | -0.511973 |
| C    | -0.307981               | 3.238459  | -0.510925 |
| C    | 1.108786                | 3.058213  | -0.511087 |
| C    | -3.231215               | -2.899217 | -1.278184 |
| C    | -4.382538               | -2.601084 | -2.000313 |
| C    | -4.927222               | -1.301930 | -2.000259 |
| C    | -4.332800               | -0.271899 | -1.278024 |
| C    | 2.402151                | -3.615749 | -1.278844 |
| C    | 3.591219                | -3.615136 | -2.001365 |
| C    | 4.443729                | -2.493668 | -2.001401 |
| C    | 4.126284                | -1.347801 | -1.278806 |
| C    | -0.895761               | 4.247902  | -1.277520 |
| C    | -0.062125               | 5.095694  | -2.000153 |
| C    | 1.335324                | 4.917906  | -2.000359 |
| C    | 1.930359                | 3.888377  | -1.277919 |
| H    | -4.866969               | -3.379075 | -2.582633 |

|    |           |           |           |
|----|-----------|-----------|-----------|
| H  | -2.792436 | -3.891264 | -1.298884 |
| H  | -5.821689 | -1.102039 | -2.582504 |
| H  | -4.732787 | 0.736415  | -1.298550 |
| H  | -1.974299 | 4.363860  | -1.298009 |
| H  | -0.493843 | 5.904025  | -2.582613 |
| H  | 1.955506  | 5.592419  | -2.582978 |
| H  | 3.003569  | 3.730594  | -1.298745 |
| H  | 4.765883  | -0.471674 | -1.299431 |
| H  | 5.359530  | -2.523865 | -2.584012 |
| H  | 3.865323  | -4.489498 | -2.583943 |
| H  | 1.729009  | -4.466374 | -1.299498 |
| Cl | 0.001209  | -0.001691 | 4.098707  |
| Ga | 0.000044  | -0.000302 | 1.955652  |

### In-TdCl

| Atom | Coordinates (Angstroms) |           |           |
|------|-------------------------|-----------|-----------|
|      | X                       | Y         | Z         |
| N    | 2.617839                | 0.121832  | -0.062103 |
| C    | 2.043809                | -1.082395 | 0.100758  |
| C    | 1.934419                | 1.267510  | 0.100829  |
| N    | 0.714886                | 1.383043  | 0.734903  |
| N    | 0.840315                | -1.310720 | 0.734895  |
| C    | -0.084440               | 2.311110  | 0.100553  |
| N    | -1.414323               | 2.206166  | -0.062564 |
| C    | -2.064865               | 1.041508  | 0.100393  |
| N    | -1.555247               | -0.072379 | 0.734576  |
| C    | 0.130550                | -2.308926 | 0.100451  |
| N    | -1.203309               | -2.327891 | -0.062706 |
| C    | -1.959237               | -1.228703 | 0.100267  |
| C    | 2.295055                | -2.257997 | -0.730442 |
| C    | 1.094096                | -3.027913 | -0.730582 |
| C    | 2.075469                | 2.461399  | -0.730287 |
| C    | 0.808242                | 3.116530  | -0.730391 |
| C    | -3.102963               | -0.858372 | -0.730867 |
| C    | -3.169282               | 0.566649  | -0.730736 |
| C    | 3.371166                | -2.618687 | -1.546122 |
| C    | 3.255471                | -3.772149 | -2.316686 |
| C    | 2.069278                | -4.532598 | -2.316807 |
| C    | 0.972727                | -4.156271 | -1.546374 |
| C    | 3.113468                | 2.920433  | -1.545936 |
| C    | 2.891256                | 4.058260  | -2.316395 |
| C    | 1.639646                | 4.705408  | -2.316404 |
| C    | 0.582737                | 4.228882  | -1.546017 |
| C    | -3.953352               | -1.609833 | -1.546704 |
| C    | -4.894491               | -0.932791 | -2.317092 |
| C    | -4.959991               | 0.474704  | -2.316956 |
| C    | -4.085771               | 1.236059  | -1.546437 |
| H    | 4.088802                | -4.088548 | -2.937177 |
| H    | 4.271343                | -2.013080 | -1.567368 |
| H    | 2.008996                | -5.421868 | -2.937390 |
| H    | 0.046622                | -4.721429 | -1.567801 |

|    |           |           |           |
|----|-----------|-----------|-----------|
| H  | -3.878954 | -2.692209 | -1.568137 |
| H  | -5.585189 | -1.496185 | -2.937640 |
| H  | -5.700024 | 0.971645  | -2.937406 |
| H  | -4.112193 | 2.320672  | -1.567649 |
| H  | -0.391809 | 4.705682  | -1.567397 |
| H  | 1.497127  | 5.585332  | -2.936870 |
| H  | 3.691640  | 4.450672  | -2.936844 |
| H  | 4.065944  | 2.400942  | -1.567250 |
| Cl | -0.000544 | -0.000204 | 4.350152  |
| In | -0.000248 | -0.000192 | 2.055209  |

### C-TdCl

| Atom | Coordinates (Angstroms) |           |           |
|------|-------------------------|-----------|-----------|
|      | X                       | Y         | Z         |
| N    | 0.281498                | 2.685053  | 0.089093  |
| C    | 1.341162                | 1.877310  | 0.181279  |
| C    | -0.922639               | 2.114654  | 0.181321  |
| N    | -1.059437               | 0.769320  | 0.476552  |
| N    | 1.195961                | 0.532856  | 0.476467  |
| C    | -2.296434               | 0.222798  | 0.181729  |
| N    | -2.466145               | -1.098762 | 0.089726  |
| C    | -1.370044               | -1.856326 | 0.181649  |
| N    | -0.136513               | -1.302106 | 0.476637  |
| C    | 2.292699                | -0.258340 | 0.181616  |
| N    | 2.184614                | -1.586363 | 0.089605  |
| C    | 0.955235                | -2.100124 | 0.181585  |
| C    | 2.733885                | 2.005411  | -0.187784 |
| C    | 3.319344                | 0.691396  | -0.187529 |
| C    | -2.258500               | 2.528801  | -0.187804 |
| C    | -3.103771               | 1.364797  | -0.187476 |
| C    | 0.369841                | -3.370272 | -0.187644 |
| C    | -1.060845               | -3.220269 | -0.187586 |
| C    | 3.484556                | 3.118215  | -0.579270 |
| C    | 4.811461                | 2.915082  | -0.942976 |
| C    | 5.385151                | 1.627518  | -0.942682 |
| C    | 4.648790                | 0.505236  | -0.578714 |
| C    | -2.762031               | 3.773083  | -0.579369 |
| C    | -4.102215               | 3.849567  | -0.943069 |
| C    | -4.930491               | 2.709000  | -0.942679 |
| C    | -4.442922               | 1.458411  | -0.578640 |
| C    | 0.958259                | -4.576765 | -0.579132 |
| C    | 0.118926                | -5.624295 | -0.943046 |
| C    | -1.282973               | -5.477309 | -0.942984 |
| C    | -1.886746               | -4.278471 | -0.579009 |
| H    | 5.419709                | 3.764331  | -1.236113 |
| H    | 3.041313                | 4.107791  | -0.589773 |
| H    | 6.423374                | 1.511742  | -1.235609 |
| H    | 5.088143                | -0.486078 | -0.588818 |
| H    | 2.036879                | -4.687713 | -0.589508 |
| H    | 0.550301                | -6.575649 | -1.236234 |
| H    | -1.902320               | -6.318493 | -1.236136 |

|    |           |           |           |
|----|-----------|-----------|-----------|
| H  | -2.964922 | -4.163280 | -0.589301 |
| H  | -5.078336 | 0.579785  | -0.588697 |
| H  | -5.970155 | 2.811068  | -1.235595 |
| H  | -4.521090 | 4.806489  | -1.236262 |
| H  | -2.123169 | 4.649199  | -0.589933 |
| Cl | 0.000121  | 0.000333  | 2.838880  |
| C  | 0.000027  | 0.000087  | 0.968956  |

### Sc-TdCl

| Atom | Coordinates (Angstroms) |           |           |
|------|-------------------------|-----------|-----------|
|      | X                       | Y         | Z         |
| N    | 1.154797                | 2.358824  | 0.085285  |
| C    | 1.920888                | 1.269372  | 0.257302  |
| C    | -0.175551               | 2.295760  | 0.257211  |
| N    | -0.830245               | 1.234865  | 0.849230  |
| N    | 1.484456                | 0.101637  | 0.849308  |
| C    | -2.059746               | 1.028799  | 0.257238  |
| N    | -2.620148               | -0.179413 | 0.085404  |
| C    | -1.900334               | -1.299969 | 0.257462  |
| N    | -0.654230               | -1.336428 | 0.849464  |
| C    | 2.075936                | -0.995837 | 0.257500  |
| N    | 1.465465                | -2.179544 | 0.085686  |
| C    | 0.138931                | -2.298283 | 0.257603  |
| C    | 3.126230                | 0.929277  | -0.492550 |
| C    | 3.223690                | -0.494779 | -0.492430 |
| C    | -1.183379               | 3.039046  | -0.492852 |
| C    | -2.367881               | 2.242553  | -0.492826 |
| C    | -0.758182               | -3.172120 | -0.492325 |
| C    | -2.040193               | -2.544515 | -0.492431 |
| C    | 4.023064                | 1.703489  | -1.233796 |
| C    | 5.033159                | 1.050336  | -1.933392 |
| C    | 5.129358                | -0.355206 | -1.933255 |
| C    | 4.217639                | -1.139741 | -1.233534 |
| C    | -1.121846               | 4.222111  | -1.234307 |
| C    | -2.257133               | 4.619166  | -1.934155 |
| C    | -3.426235               | 3.833026  | -1.934120 |
| C    | -3.486771               | 2.631853  | -1.234238 |
| C    | -0.535967               | -4.335925 | -1.233492 |
| C    | -1.606534               | -4.884145 | -1.933260 |
| C    | -2.871871               | -4.264692 | -1.933377 |
| C    | -3.095591               | -3.082855 | -1.233702 |
| H    | 5.757230                | 1.631382  | -2.496571 |
| H    | 3.930402                | 2.784296  | -1.253643 |
| H    | 5.925864                | -0.832290 | -2.496310 |
| H    | 4.273077                | -2.223099 | -1.253149 |
| H    | 0.446370                | -4.796089 | -1.253134 |
| H    | -1.465262               | -5.801753 | -2.496378 |
| H    | -3.683177               | -4.715961 | -2.496583 |
| H    | -4.061533               | -2.589207 | -1.253502 |
| H    | -4.376410               | 2.011147  | -1.253937 |
| H    | -4.291475               | 4.169385  | -2.497400 |



|    |           |          |           |
|----|-----------|----------|-----------|
| H  | -2.242250 | 5.547351 | -2.497460 |
| H  | -0.211389 | 4.811858 | -1.254052 |
| Sc | -0.000171 | 0.000346 | 2.243364  |
| Cl | -0.000507 | 0.000929 | 4.603247  |

### Cr(2)-TdCl

| Atom | Coordinates (Angstroms) |           |           |
|------|-------------------------|-----------|-----------|
|      | X                       | Y         | Z         |
| N    | 2.272142                | 1.300052  | 0.066847  |
| C    | 2.306525                | -0.023027 | 0.261234  |
| C    | 1.139587                | 1.996707  | 0.237730  |
| N    | 0.000040                | 1.469073  | 0.820114  |
| N    | 1.264391                | -0.750363 | 0.817227  |
| C    | -1.139476               | 1.996771  | 0.237728  |
| N    | -2.272070               | 1.300179  | 0.066843  |
| C    | -2.306527               | -0.022898 | 0.261231  |
| N    | -1.264433               | -0.750291 | 0.817224  |
| C    | 1.164224                | -2.003537 | 0.235329  |
| N    | -0.000074               | -2.633341 | 0.034762  |
| C    | -1.164336               | -2.003472 | 0.235328  |
| C    | 3.150336                | -0.995019 | -0.425713 |
| C    | 2.431450                | -2.228903 | -0.451494 |
| C    | 0.714916                | 3.180118  | -0.493492 |
| C    | -0.714737               | 3.180159  | -0.493493 |
| C    | -2.431576               | -2.228768 | -0.451494 |
| C    | -3.150393               | -0.994844 | -0.425713 |
| C    | 4.372937                | -0.870077 | -1.089597 |
| C    | 4.882425                | -1.986265 | -1.747194 |
| C    | 4.173498                | -3.202257 | -1.773417 |
| C    | 2.938770                | -3.331300 | -1.143247 |
| C    | 1.425617                | 4.152239  | -1.204919 |
| C    | 0.705120                | 5.130389  | -1.880908 |
| C    | -0.704828               | 5.130429  | -1.880909 |
| C    | -1.425382               | 4.152320  | -1.204920 |
| C    | -2.938958               | -3.331138 | -1.143244 |
| C    | -4.173680               | -3.202027 | -1.773412 |
| C    | -4.882540               | -1.985996 | -1.747189 |
| C    | -4.372989               | -0.869836 | -1.089595 |
| H    | 5.839618                | -1.918480 | -2.255161 |
| H    | 4.906099                | 0.074778  | -1.086139 |
| H    | 4.596819                | -4.052056 | -2.300314 |
| H    | 2.381459                | -4.261384 | -1.179976 |
| H    | -2.381698               | -4.261253 | -1.179972 |
| H    | -4.597049               | -4.051804 | -2.300306 |
| H    | -5.839730               | -1.918159 | -2.255154 |
| H    | -4.906098               | 0.075050  | -1.086138 |
| H    | -2.510072               | 4.138356  | -1.220370 |
| H    | -1.234595               | 5.906105  | -2.425540 |
| H    | 1.234931                | 5.906035  | -2.425539 |
| H    | 2.510306                | 4.138213  | -1.220368 |
| Cr   | -0.000002               | -0.002597 | 1.929687  |

|    |          |          |          |
|----|----------|----------|----------|
| Cl | 0.000010 | 0.170656 | 4.115857 |
|----|----------|----------|----------|

### Cr(4)-TdCl

| Atom | Coordinates (Angstroms) |           |           |
|------|-------------------------|-----------|-----------|
|      | X                       | Y         | Z         |
| N    | 1.642301                | -2.069921 | 0.050835  |
| C    | 0.326987                | -2.273008 | 0.214071  |
| C    | 2.139313                | -0.834860 | 0.213083  |
| N    | 1.432218                | 0.212476  | 0.759258  |
| N    | -0.531755               | -1.346413 | 0.760633  |
| C    | 1.804834                | 1.419964  | 0.213050  |
| N    | 0.970666                | 2.457539  | 0.050734  |
| C    | -0.346945               | 2.270022  | 0.213903  |
| N    | -0.899717               | 1.134050  | 0.760494  |
| C    | -1.793371               | -1.435554 | 0.216604  |
| N    | -2.614551               | -0.387878 | 0.055199  |
| C    | -2.132869               | 0.853044  | 0.216491  |
| C    | -0.515790               | -3.245065 | -0.472529 |
| C    | -1.843797               | -2.720423 | -0.471024 |
| C    | 3.276315                | -0.235786 | -0.475473 |
| C    | 3.066743                | 1.176728  | -0.475555 |
| C    | -2.554179               | 2.067984  | -0.471089 |
| C    | -1.435685               | 2.955563  | -0.472652 |
| C    | -0.219353               | -4.429472 | -1.151910 |
| C    | -1.258895               | -5.096291 | -1.793296 |
| C    | -2.569019               | -4.578769 | -1.791804 |
| C    | -2.870975               | -3.382045 | -1.148936 |
| C    | 4.361731                | -0.794120 | -1.155691 |
| C    | 5.246045                | 0.066095  | -1.799407 |
| C    | 5.039301                | 1.459581  | -1.799492 |
| C    | 3.943311                | 2.026068  | -1.155870 |
| C    | -3.729270               | 2.402924  | -1.148831 |
| C    | -3.787840               | 3.635829  | -1.791594 |
| C    | -2.684396               | 4.511404  | -1.793159 |
| C    | -1.495949               | 4.175061  | -1.151933 |
| H    | -1.058147               | -6.029510 | -2.310720 |
| H    | 0.795080                | -4.813561 | -1.170855 |
| H    | -3.354362               | -5.122503 | -2.308055 |
| H    | -3.874132               | -2.969294 | -1.165529 |
| H    | -4.569387               | 1.716708  | -1.165389 |
| H    | -4.697285               | 3.928166  | -2.307709 |
| H    | -2.763280               | 5.462759  | -2.310482 |
| H    | -0.636740               | 4.837147  | -1.170925 |
| H    | 3.768851                | 3.096684  | -1.173562 |
| H    | 5.746382                | 2.100238  | -2.317680 |
| H    | 6.108672                | -0.341735 | -2.317555 |
| H    | 4.505594                | -1.869277 | -1.173287 |
| Cr   | 0.000912                | 0.000207  | 1.986037  |
| Cl   | 0.012662                | 0.001824  | 4.209707  |

**Fe(2)-TdCl**

| Atom | Coordinates (Angstroms) |           |           |
|------|-------------------------|-----------|-----------|
|      | X                       | Y         | Z         |
| N    | -0.031003               | -2.638951 | 0.042042  |
| C    | -1.180596               | -1.973931 | 0.213623  |
| C    | 1.133884                | -2.000838 | 0.212785  |
| N    | 1.244857                | -0.738095 | 0.755163  |
| N    | -1.261861               | -0.709035 | 0.756325  |
| C    | 2.299630                | -0.034949 | 0.212908  |
| N    | 2.300608                | 1.293267  | 0.042153  |
| C    | 1.165562                | 1.982803  | 0.213668  |
| N    | 0.016734                | 1.447259  | 0.756355  |
| C    | -2.300261               | 0.018473  | 0.214512  |
| N    | -2.270562               | 1.346332  | 0.043745  |
| C    | -1.119714               | 2.009396  | 0.214528  |
| C    | -2.455240               | -2.198208 | -0.456881 |
| C    | -3.154831               | -0.953176 | -0.456460 |
| C    | 2.402528                | -2.254702 | -0.458562 |
| C    | 3.130920                | -1.026282 | -0.458557 |
| C    | -0.677110               | 3.225372  | -0.456378 |
| C    | 0.750907                | 3.208759  | -0.456880 |
| C    | -2.984529               | -3.311348 | -1.114437 |
| C    | -4.220945               | -3.178562 | -1.739440 |
| C    | -4.910791               | -1.950775 | -1.739101 |
| C    | -4.381009               | -0.825984 | -1.113675 |
| C    | 2.905264                | -3.379821 | -1.116563 |
| C    | 4.144004                | -3.275823 | -1.742415 |
| C    | 4.862246                | -2.064440 | -1.742489 |
| C    | 4.359229                | -0.927639 | -1.116657 |
| C    | -1.376918               | 4.240241  | -1.113590 |
| C    | -0.644133               | 5.244729  | -1.738914 |
| C    | 0.764087                | 5.228363  | -1.739367 |
| C    | 1.473711                | 4.207087  | -1.114549 |
| H    | -4.661205               | -4.034092 | -2.242514 |
| H    | -2.441673               | -4.250466 | -1.130422 |
| H    | -5.870614               | -1.881612 | -2.241893 |
| H    | -4.900880               | 0.126067  | -1.128996 |
| H    | -2.461657               | 4.239684  | -1.128872 |
| H    | -1.165244               | 6.053761  | -2.241660 |
| H    | 1.303564                | 6.025061  | -2.242442 |
| H    | 2.558134                | 4.181283  | -1.130552 |
| H    | 4.901103                | 0.012054  | -1.132290 |
| H    | 5.823081                | -2.017634 | -2.245925 |
| H    | 4.563883                | -4.141360 | -2.245797 |
| H    | 2.340717                | -4.306072 | -1.132157 |
| Fe   | 0.000493                | -0.000352 | 1.821049  |
| Cl   | 0.005365                | -0.003260 | 3.981359  |

**Fe(6)-TdCl**

| Atom | Coordinates (Angstroms) |           |           |
|------|-------------------------|-----------|-----------|
|      | X                       | Y         | Z         |
| N    | -0.797085               | 2.502406  | 0.077893  |
| C    | 0.508819                | 2.248378  | 0.251301  |
| C    | -1.715581               | 1.540081  | 0.251611  |
| N    | -1.460210               | 0.319309  | 0.841728  |
| N    | 1.006519                | 1.105180  | 0.841906  |
| C    | -2.201849               | -0.683592 | 0.251925  |
| N    | -1.768888               | -1.941486 | 0.078472  |
| C    | -0.476096               | -2.255601 | 0.251716  |
| N    | 0.453357                | -1.424291 | 0.842069  |
| C    | 2.191548                | 0.715665  | 0.252254  |
| N    | 2.565711                | -0.561025 | 0.079094  |
| C    | 1.692772                | -1.564964 | 0.252322  |
| C    | 1.617396                | 2.835358  | -0.493593 |
| C    | 2.673233                | 1.873676  | -0.492975 |
| C    | -2.959525               | 1.377929  | -0.493191 |
| C    | -3.264626               | -0.017237 | -0.492935 |
| C    | 1.647107                | -2.818325 | -0.492892 |
| C    | 0.286274                | -3.251655 | -0.493302 |
| C    | 1.733071                | 4.018171  | -1.229082 |
| C    | 2.916625                | 4.246800  | -1.923715 |
| C    | 3.958427                | 3.297897  | -1.923117 |
| C    | 3.840583                | 2.098590  | -1.227871 |
| C    | -3.738033               | 2.276133  | -1.228424 |
| C    | -4.835864               | 1.778289  | -1.923030 |
| C    | -5.136941               | 0.401647  | -1.922729 |
| C    | -4.347075               | -0.508744 | -1.227848 |
| C    | 2.613994                | -3.509874 | -1.227908 |
| C    | 2.220472                | -4.648870 | -1.923179 |
| C    | 0.877730                | -5.076431 | -1.923607 |
| C    | -0.102317               | -4.374811 | -1.228754 |
| H    | 3.040216                | 5.169153  | -2.483145 |
| H    | 0.919241                | 4.735307  | -1.248081 |
| H    | 4.865620                | 3.506558  | -2.482075 |
| H    | 4.630410                | 1.355077  | -1.245893 |
| H    | 3.642038                | -3.163814 | -1.246064 |
| H    | 2.957733                | -5.217061 | -2.482267 |
| H    | 0.605054                | -5.966180 | -2.483042 |
| H    | -1.141161               | -4.686924 | -1.247586 |
| H    | -4.561357               | -1.572091 | -1.246130 |
| H    | -5.997769               | 0.047342  | -2.481672 |
| H    | -5.470269               | 2.459354  | -2.482184 |
| H    | -3.488902               | 3.331853  | -1.247103 |
| Fe   | -0.000123               | 0.000186  | 2.048846  |
| Cl   | 0.000333                | 0.000287  | 4.230544  |

**Ru(2)-TdCl**

| Atom | Coordinates (Angstroms) |  |  |
|------|-------------------------|--|--|
|------|-------------------------|--|--|

|    | X         | Y         | Z         |
|----|-----------|-----------|-----------|
| N  | 2.327788  | -1.238532 | -0.121262 |
| C  | 1.210903  | -1.956409 | 0.048608  |
| C  | 2.298367  | 0.089284  | 0.045286  |
| N  | 1.244018  | 0.777758  | 0.607779  |
| N  | 0.051244  | -1.466048 | 0.611379  |
| C  | 1.087194  | 2.027005  | 0.044880  |
| N  | -0.093517 | 2.635057  | -0.122149 |
| C  | -1.228134 | 1.945551  | 0.047825  |
| N  | -1.295391 | 0.688428  | 0.610960  |
| C  | -1.072641 | -2.036577 | 0.051697  |
| N  | -2.237544 | -1.398742 | -0.115182 |
| C  | -2.300531 | -0.072086 | 0.051327  |
| C  | 0.824055  | -3.177226 | -0.647751 |
| C  | -0.602958 | -3.227236 | -0.646001 |
| C  | 3.092872  | 1.091182  | -0.654634 |
| C  | 2.335994  | 2.302000  | -0.655010 |
| C  | -3.165240 | 0.871589  | -0.646362 |
| C  | -2.495112 | 2.132471  | -0.648496 |
| C  | 1.569377  | -4.138911 | -1.335149 |
| C  | 0.882416  | -5.160588 | -1.984940 |
| C  | -0.525578 | -5.209899 | -1.983273 |
| C  | -1.280796 | -4.238748 | -1.331734 |
| C  | 4.306109  | 1.009656  | -1.343266 |
| C  | 4.767922  | 2.149032  | -1.996341 |
| C  | 4.021169  | 3.343718  | -1.996693 |
| C  | 2.794449  | 3.428039  | -1.344012 |
| C  | -4.371647 | 0.705237  | -1.331720 |
| C  | -4.913999 | 1.809473  | -1.983232 |
| C  | -4.252859 | 3.053578  | -1.985281 |
| C  | -3.033273 | 3.223646  | -1.335935 |
| H  | 1.439370  | -5.931160 | -2.509564 |
| H  | 2.652915  | -4.085482 | -1.353752 |
| H  | -1.028484 | -6.017622 | -2.506605 |
| H  | -2.365457 | -4.261327 | -1.347652 |
| H  | -4.867137 | -0.259911 | -1.347315 |
| H  | -5.860594 | 1.711165  | -2.506206 |
| H  | -4.701768 | 3.891754  | -2.509825 |
| H  | -2.510626 | 4.174300  | -1.354735 |
| H  | 2.206425  | 4.339731  | -1.361402 |
| H  | 4.408794  | 4.211178  | -2.522494 |
| H  | 5.717645  | 2.117206  | -2.521904 |
| H  | 4.867967  | 0.081602  | -1.360170 |
| Ru | 0.002249  | 0.001674  | 1.884145  |
| Cl | 0.016320  | 0.010987  | 4.197637  |

### Ru(6)-TdCl

| Atom | Coordinates (Angstroms) |           |           |
|------|-------------------------|-----------|-----------|
|      | X                       | Y         | Z         |
| N    | 1.416286                | -2.187776 | -0.229515 |
| C    | 0.076196                | -2.240771 | -0.125389 |

|    |           |           |           |
|----|-----------|-----------|-----------|
| C  | 2.029415  | -1.020253 | 0.029401  |
| N  | 1.467108  | 0.041944  | 0.675981  |
| N  | -0.698277 | -1.317032 | 0.508183  |
| C  | 1.947167  | 1.204626  | 0.149444  |
| N  | 1.246123  | 2.345224  | 0.021977  |
| C  | -0.093143 | 2.285998  | 0.131512  |
| N  | -0.792093 | 1.240100  | 0.656769  |
| C  | -1.889935 | -1.198617 | -0.140712 |
| N  | -2.596928 | -0.060798 | -0.261925 |
| C  | -1.978291 | 1.104064  | -0.003838 |
| C  | -0.803603 | -3.051439 | -0.993234 |
| C  | -2.056536 | -2.387662 | -1.002636 |
| C  | 3.234347  | -0.530716 | -0.672719 |
| C  | 3.180513  | 0.884146  | -0.598770 |
| C  | -2.240703 | 2.370411  | -0.719483 |
| C  | -1.040563 | 3.120745  | -0.636128 |
| C  | -0.579380 | -4.167662 | -1.789380 |
| C  | -1.645726 | -4.644903 | -2.563106 |
| C  | -2.883572 | -3.989161 | -2.572343 |
| C  | -3.096645 | -2.834109 | -1.808201 |
| C  | 4.227026  | -1.171586 | -1.403537 |
| C  | 5.201235  | -0.376905 | -2.022123 |
| C  | 5.147935  | 1.021046  | -1.949160 |
| C  | 4.118726  | 1.670998  | -1.255187 |
| C  | -3.318933 | 2.826424  | -1.467590 |
| C  | -3.200182 | 4.073851  | -2.094593 |
| C  | -2.014331 | 4.815059  | -2.012383 |
| C  | -0.907636 | 4.333686  | -1.300441 |
| H  | -1.508427 | -5.532523 | -3.173382 |
| H  | 0.390661  | -4.653696 | -1.804551 |
| H  | -3.687904 | -4.377942 | -3.189642 |
| H  | -4.043359 | -2.304675 | -1.837671 |
| H  | -4.223657 | 2.233957  | -1.556262 |
| H  | -4.037472 | 4.469209  | -2.661834 |
| H  | -1.949449 | 5.774359  | -2.517041 |
| H  | 0.023631  | 4.889293  | -1.261920 |
| H  | 4.055210  | 2.753790  | -1.224181 |
| H  | 5.912258  | 1.610166  | -2.447044 |
| H  | 6.006057  | -0.851342 | -2.575564 |
| H  | 4.245675  | -2.253413 | -1.485455 |
| Cl | -0.405376 | -0.598337 | 4.539927  |
| Ru | -0.069719 | -0.104562 | 2.269979  |

### Os(2)-TdCl

| Atom | Coordinates (Angstroms) |          |           |
|------|-------------------------|----------|-----------|
|      | X                       | Y        | Z         |
| N    | 0.514576                | 2.582235 | -0.333018 |
| C    | 1.525574                | 1.722783 | -0.160199 |
| C    | -0.748734               | 2.174840 | -0.164457 |
| N    | -1.104487               | 0.968026 | 0.410507  |
| N    | 1.390526                | 0.471965 | 0.414580  |

|    |           |           |           |
|----|-----------|-----------|-----------|
| C  | -2.254502 | 0.457039  | -0.163905 |
| N  | -2.492784 | -0.848801 | -0.332139 |
| C  | -1.508094 | -1.738338 | -0.159495 |
| N  | -0.285639 | -1.440303 | 0.414944  |
| C  | 2.260570  | -0.439788 | -0.155390 |
| N  | 1.982711  | -1.737895 | -0.323419 |
| C  | 0.732175  | -2.183381 | -0.155155 |
| C  | 2.799528  | 1.701928  | -0.865010 |
| C  | 3.258908  | 0.350233  | -0.862134 |
| C  | -1.931300 | 2.641619  | -0.874350 |
| C  | -2.872277 | 1.568007  | -0.874162 |
| C  | 0.079723  | -3.276776 | -0.861591 |
| C  | -1.320527 | -2.998562 | -0.864321 |
| C  | 3.500394  | 2.690391  | -1.561355 |
| C  | 4.672232  | 2.325618  | -2.218394 |
| C  | 5.125547  | 0.991693  | -2.215594 |
| C  | 4.417791  | -0.009098 | -1.555688 |
| C  | -2.198569 | 3.822176  | -1.572887 |
| C  | -3.418250 | 3.932136  | -2.234938 |
| C  | -4.346797 | 2.872627  | -2.234834 |
| C  | -4.077742 | 1.678000  | -1.572621 |
| C  | 0.587815  | -4.378481 | -1.555314 |
| C  | -0.311606 | -5.211147 | -2.215374 |
| C  | -1.693440 | -4.936565 | -2.218090 |
| C  | -2.208642 | -3.822816 | -1.560767 |
| H  | 5.245046  | 3.079581  | -2.750080 |
| H  | 3.136098  | 3.712244  | -1.581369 |
| H  | 6.039837  | 0.740864  | -2.745148 |
| H  | 4.751669  | -1.041366 | -1.571336 |
| H  | 1.654943  | -4.574142 | -1.571079 |
| H  | 0.056863  | -6.084552 | -2.745151 |
| H  | -2.365843 | -5.603140 | -2.749899 |
| H  | -3.269441 | -3.595637 | -1.580658 |
| H  | -4.780620 | 0.851597  | -1.590253 |
| H  | -5.285437 | 2.989574  | -2.768261 |
| H  | -3.657347 | 4.847254  | -2.768474 |
| H  | -1.471480 | 4.627355  | -1.590815 |
| Os | -0.002536 | 0.002514  | 1.703949  |
| Cl | -0.018503 | 0.016935  | 4.000491  |

### Os(6)-TdCl

| Atom | Coordinates (Angstroms) |           |           |
|------|-------------------------|-----------|-----------|
|      | X                       | Y         | Z         |
| N    | 2.446001                | 1.250760  | 0.007101  |
| C    | 2.322860                | -0.081990 | 0.095255  |
| C    | 1.278243                | 1.954395  | -0.027039 |
| N    | 0.096232                | 1.507515  | 0.444137  |
| N    | 1.225697                | -0.782975 | 0.541291  |
| C    | -0.959256               | 2.075453  | -0.249384 |
| N    | -2.095695               | 1.382296  | -0.569709 |
| C    | -2.191540               | 0.092095  | -0.384722 |

|    |           |           |           |
|----|-----------|-----------|-----------|
| N  | -1.347104 | -0.754053 | 0.388949  |
| C  | 1.148586  | -2.040031 | -0.083311 |
| N  | -0.027924 | -2.613599 | -0.449439 |
| C  | -1.158584 | -1.959631 | -0.328218 |
| C  | 3.199934  | -1.077351 | -0.534800 |
| C  | 2.454107  | -2.288089 | -0.655130 |
| C  | 0.997447  | 3.139894  | -0.844554 |
| C  | -0.423667 | 3.209107  | -0.980705 |
| C  | -2.356519 | -2.100927 | -1.171554 |
| C  | -3.000586 | -0.837102 | -1.198281 |
| C  | 4.473865  | -0.961672 | -1.080553 |
| C  | 5.024742  | -2.079446 | -1.715357 |
| C  | 4.292233  | -3.272190 | -1.838143 |
| C  | 2.997470  | -3.385494 | -1.329292 |
| C  | 1.826277  | 4.038932  | -1.508412 |
| C  | 1.229470  | 5.036391  | -2.286185 |
| C  | -0.166965 | 5.103689  | -2.426774 |
| C  | -1.006064 | 4.184115  | -1.794083 |
| C  | -2.823107 | -3.155390 | -1.946615 |
| C  | -3.972506 | -2.945635 | -2.720617 |
| C  | -4.608673 | -1.699261 | -2.745810 |
| C  | -4.115366 | -0.621370 | -1.997919 |
| H  | 6.026792  | -2.022829 | -2.129261 |
| H  | 5.018186  | -0.025519 | -1.010244 |
| H  | 4.740728  | -4.120497 | -2.346867 |
| H  | 2.425423  | -4.300028 | -1.446033 |
| H  | -2.310628 | -4.111644 | -1.945877 |
| H  | -4.370384 | -3.760646 | -3.317658 |
| H  | -5.491873 | -1.562448 | -3.362389 |
| H  | -4.585114 | 0.355760  | -2.037254 |
| H  | -2.082823 | 4.225904  | -1.922235 |
| H  | -0.600903 | 5.883183  | -3.046222 |
| H  | 1.852916  | 5.762796  | -2.798576 |
| H  | 2.905321  | 3.961996  | -1.420919 |
| Cl | -1.111375 | 0.538607  | 3.817504  |
| Os | -0.177488 | -0.149249 | 1.813985  |

### Co(3)-TdCl

| Atom | Coordinates (Angstroms) |           |          |
|------|-------------------------|-----------|----------|
|      | X                       | Y         | Z        |
| N    | 2.522361                | -0.681465 | 0.096076 |
| C    | 1.588056                | -1.632272 | 0.269210 |
| C    | 2.193911                | 0.610543  | 0.268558 |
| N    | 1.069895                | 1.065737  | 0.900206 |
| N    | 0.387907                | -1.459614 | 0.901292 |
| C    | 0.619589                | 2.190995  | 0.267444 |
| N    | -0.670953               | 2.524698  | 0.093889 |
| C    | -1.625573               | 1.594322  | 0.266816 |
| N    | -1.457816               | 0.393704  | 0.899253 |
| C    | -0.567792               | -2.205312 | 0.268687 |
| N    | -1.850790               | -1.843931 | 0.094891 |



|    |           |           |           |
|----|-----------|-----------|-----------|
| C  | -2.207250 | -0.559361 | 0.267262  |
| C  | 1.496159  | -2.868179 | -0.532622 |
| C  | 0.126069  | -3.232298 | -0.533068 |
| C  | 2.736720  | 1.724439  | -0.533609 |
| C  | 1.736184  | 2.728808  | -0.534408 |
| C  | -3.231178 | 0.138184  | -0.535191 |
| C  | -2.861586 | 1.506837  | -0.535375 |
| C  | 2.423944  | -3.575253 | -1.286410 |
| C  | 1.971388  | -4.688278 | -2.006369 |
| C  | 0.617974  | -5.047816 | -2.006977 |
| C  | -0.327878 | -4.306380 | -1.287512 |
| C  | 3.894353  | 1.868073  | -1.287382 |
| C  | 4.063756  | 3.057440  | -2.007586 |
| C  | 3.075436  | 4.049505  | -2.008423 |
| C  | 1.884847  | 3.885245  | -1.289033 |
| C  | -4.306986 | -0.311811 | -1.289555 |
| C  | -5.044354 | 0.636594  | -2.009852 |
| C  | -4.679289 | 1.988512  | -2.010005 |
| C  | -3.564709 | 2.436999  | -1.289893 |
| H  | 2.679438  | -5.276936 | -2.581537 |
| H  | 3.465942  | -3.274174 | -1.309603 |
| H  | 0.295900  | -5.910120 | -2.582629 |
| H  | -1.381894 | -4.562155 | -1.311537 |
| H  | -4.567077 | -1.364783 | -1.312982 |
| H  | -5.907821 | 0.317672  | -2.585511 |
| H  | -5.264871 | 2.698616  | -2.585783 |
| H  | -3.259451 | 3.477771  | -1.313629 |
| H  | 1.102984  | 4.636945  | -1.313231 |
| H  | 3.231344  | 4.956605  | -2.584213 |
| H  | 4.971929  | 3.209414  | -2.582736 |
| H  | 4.643145  | 1.083385  | -1.310297 |
| Co | -0.000736 | 0.000901  | 2.119364  |
| Cl | -0.003804 | 0.003079  | 4.323729  |

### Co(5)-TdCl

| Atom | Coordinates (Angstroms) |           |           |
|------|-------------------------|-----------|-----------|
|      | X                       | Y         | Z         |
| N    | 2.082400                | -1.578037 | 0.100525  |
| C    | 0.859118                | -2.108115 | 0.272031  |
| C    | 2.262001                | -0.256923 | 0.271343  |
| N    | 1.394350                | 0.587512  | 0.906221  |
| N    | -0.188297               | -1.501110 | 0.907206  |
| C    | 1.395995                | 1.798179  | 0.271157  |
| N    | 0.325047                | 2.592389  | 0.100267  |
| C    | -0.908804               | 2.087446  | 0.272114  |
| N    | -1.205867               | 0.913837  | 0.907256  |
| C    | -1.353625               | -1.830558 | 0.272748  |
| N    | -2.408065               | -1.014551 | 0.101974  |
| C    | -2.255654               | 0.309952  | 0.272961  |
| C    | 0.310426                | -3.215959 | -0.534255 |
| C    | -1.096044               | -3.039332 | -0.534156 |

|    |           |           |           |
|----|-----------|-----------|-----------|
| C  | 3.179820  | 0.570624  | -0.535664 |
| C  | 2.629320  | 1.876891  | -0.535862 |
| C  | -2.940784 | 1.338522  | -0.533993 |
| C  | -2.084916 | 2.468488  | -0.534175 |
| C  | 0.905385  | -4.215792 | -1.292909 |
| C  | 0.068405  | -5.074272 | -2.016836 |
| C  | -1.321195 | -4.899606 | -2.016965 |
| C  | -1.919814 | -3.860797 | -1.292993 |
| C  | 4.303019  | 0.268018  | -1.294627 |
| C  | 4.903027  | 1.305798  | -2.018916 |
| C  | 4.359123  | 2.596402  | -2.019159 |
| C  | 3.197239  | 2.891935  | -1.295072 |
| C  | -4.103999 | 1.322594  | -1.292848 |
| C  | -4.429313 | 2.476383  | -2.017118 |
| C  | -3.583740 | 3.592844  | -2.017231 |
| C  | -2.384880 | 3.592425  | -1.293120 |
| H  | 0.503726  | -5.883059 | -2.595649 |
| H  | 1.984267  | -4.327227 | -1.316440 |
| H  | -1.943029 | -5.575547 | -2.595835 |
| H  | -2.992736 | -3.701910 | -1.316518 |
| H  | -4.739603 | 0.443723  | -1.316293 |
| H  | -5.347330 | 2.503310  | -2.596070 |
| H  | -3.858419 | 4.469111  | -2.596346 |
| H  | -1.711012 | 4.442306  | -1.316930 |
| H  | 2.754057  | 3.881878  | -1.318799 |
| H  | 4.841556  | 3.377709  | -2.598366 |
| H  | 5.799253  | 1.105264  | -2.597907 |
| H  | 4.702087  | -0.740526 | -1.317999 |
| Co | 0.000649  | 0.000352  | 2.125145  |
| Cl | 0.003059  | 0.001429  | 4.329492  |

### Rh(3)-TdCl

| Atom | Coordinates (Angstroms) |           |           |
|------|-------------------------|-----------|-----------|
|      | X                       | Y         | Z         |
| N    | 2.486533                | -0.003242 | -0.375810 |
| C    | 1.850352                | -1.160484 | -0.137835 |
| C    | 1.853211                | 1.155645  | -0.138223 |
| N    | 0.721270                | 1.314821  | 0.607735  |
| N    | 0.718148                | -1.316731 | 0.608371  |
| C    | -0.058182               | 2.288870  | 0.076848  |
| N    | -1.405018               | 2.288899  | 0.093070  |
| C    | -2.024748               | 1.126242  | 0.341805  |
| N    | -1.450380               | 0.001909  | 0.875305  |
| C    | -0.063761               | -2.288914 | 0.077718  |
| N    | -1.410596               | -2.285547 | 0.093958  |
| C    | -2.027434               | -1.121243 | 0.342249  |
| C    | 1.999016                | -2.381360 | -0.957637 |
| C    | 0.780937                | -3.095670 | -0.824421 |
| C    | 2.004975                | 2.375980  | -0.958269 |
| C    | 0.788647                | 3.093321  | -0.825327 |
| C    | -3.313344               | -0.704826 | -0.246164 |

|    |           |           |           |
|----|-----------|-----------|-----------|
| C  | -3.311661 | 0.712693  | -0.246420 |
| C  | 2.994330  | -2.819743 | -1.821111 |
| C  | 2.775654  | -4.016018 | -2.518177 |
| C  | 1.572854  | -4.721054 | -2.386924 |
| C  | 0.547081  | -4.254564 | -1.553417 |
| C  | 3.001490  | 2.811720  | -1.821704 |
| C  | 2.785862  | 4.008383  | -2.519034 |
| C  | 1.584781  | 4.716419  | -2.388071 |
| C  | 0.557764  | 4.252653  | -1.554601 |
| C  | -4.350763 | -1.419521 | -0.832263 |
| C  | -5.417310 | -0.694229 | -1.379177 |
| C  | -5.415636 | 0.706761  | -1.379428 |
| C  | -4.347355 | 1.429685  | -0.832765 |
| H  | 3.548134  | -4.398438 | -3.178522 |
| H  | 3.911833  | -2.253848 | -1.944017 |
| H  | 1.429620  | -5.639849 | -2.947571 |
| H  | -0.398230 | -4.781170 | -1.473463 |
| H  | -4.331960 | -2.504001 | -0.859283 |
| H  | -6.255161 | -1.226169 | -1.819657 |
| H  | -6.252211 | 1.240544  | -1.820104 |
| H  | -4.325941 | 2.514106  | -0.860165 |
| H  | -0.386256 | 4.781604  | -1.474857 |
| H  | 1.443909  | 5.635446  | -2.948938 |
| H  | 3.559356  | 4.388780  | -3.179360 |
| H  | 3.917611  | 2.243535  | -1.944348 |
| Rh | 0.142535  | 0.000196  | 2.108986  |
| Cl | 1.853232  | -0.000859 | 3.713036  |

### Rh(5)-TdCl

| Atom | Coordinates (Angstroms) |           |           |
|------|-------------------------|-----------|-----------|
|      | X                       | Y         | Z         |
| N    | 2.609784                | -0.232590 | -0.147221 |
| C    | 1.845066                | -1.324751 | 0.020229  |
| C    | 2.050171                | 0.977606  | 0.019891  |
| N    | 0.855606                | 1.217826  | 0.632979  |
| N    | 0.626797                | -1.349724 | 0.633148  |
| C    | 0.224792                | 2.260004  | 0.019397  |
| N    | -1.103392               | 2.376222  | -0.148199 |
| C    | -1.871745               | 1.286617  | 0.019380  |
| N    | -1.482337               | 0.132194  | 0.632654  |
| C    | -0.178334               | -2.264321 | 0.020166  |
| N    | -1.506176               | -2.143879 | -0.147295 |
| C    | -2.069706               | -0.935490 | 0.019854  |
| C    | 1.975970                | -2.571670 | -0.761510 |
| C    | 0.689917                | -3.168982 | -0.761386 |
| C    | 2.399481                | 2.181531  | -0.762190 |
| C    | 1.239202                | 2.996651  | -0.762483 |
| C    | -3.215123               | -0.425582 | -0.761844 |
| C    | -3.089185               | 0.986822  | -0.762355 |
| C    | 3.018898                | -3.118804 | -1.498522 |
| C    | 2.771932                | -4.305935 | -2.200593 |

|    |           |           |           |
|----|-----------|-----------|-----------|
| C  | 1.501421  | -4.896146 | -2.200344 |
| C  | 0.435137  | -4.319023 | -1.498100 |
| C  | 3.522714  | 2.535578  | -1.499250 |
| C  | 3.489312  | 3.747333  | -2.201899 |
| C  | 2.342988  | 4.552632  | -2.202167 |
| C  | 1.191519  | 4.173234  | -1.499786 |
| C  | -4.210664 | -1.055419 | -1.498354 |
| C  | -5.115207 | -0.248164 | -2.200717 |
| C  | -4.990768 | 1.147208  | -2.201275 |
| C  | -3.957622 | 1.782255  | -1.499486 |
| H  | 3.575836  | -4.772140 | -2.762258 |
| H  | 3.992821  | -2.641038 | -1.522411 |
| H  | 1.338995  | -5.811254 | -2.761834 |
| H  | -0.558178 | -4.755052 | -1.521717 |
| H  | -4.284059 | -2.137744 | -1.521692 |
| H  | -5.921067 | -0.711392 | -2.762042 |
| H  | -5.702012 | 1.745263  | -2.763002 |
| H  | -3.838445 | 2.860480  | -1.523614 |
| H  | 0.290822  | 4.777825  | -1.523698 |
| H  | 2.344762  | 5.481785  | -2.764083 |
| H  | 4.362967  | 4.063996  | -2.763618 |
| H  | 4.396964  | 1.893325  | -1.522783 |
| Cl | 0.000215  | 0.001711  | 4.522511  |
| Rh | -0.000134 | 0.000387  | 2.190170  |

### Ir(3)-TdCl

| Atom | Coordinates (Angstroms) |           |           |
|------|-------------------------|-----------|-----------|
|      | X                       | Y         | Z         |
| N    | -2.260289               | -1.327619 | -0.287757 |
| C    | -2.274224               | 0.001333  | -0.146638 |
| C    | -1.131072               | -2.032758 | -0.115748 |
| N    | -0.002424               | -1.522045 | 0.456603  |
| N    | -1.249264               | 0.774579  | 0.388665  |
| C    | 1.125081                | -2.036487 | -0.114653 |
| N    | 2.256768                | -1.335056 | -0.285552 |
| C    | 2.274814                | -0.006136 | -0.144423 |
| N    | 1.251792                | 0.770341  | 0.389805  |
| C    | -1.151892               | 2.002845  | -0.238749 |
| N    | 0.004814                | 2.643442  | -0.443111 |
| C    | 1.159167                | 1.999001  | -0.237603 |
| C    | -3.110514               | 0.941365  | -0.881931 |
| C    | -2.410817               | 2.184708  | -0.942739 |
| C    | -0.718476               | -3.229454 | -0.852086 |
| C    | 0.709248                | -3.231813 | -0.851399 |
| C    | 2.419420                | 2.176809  | -0.940248 |
| C    | 3.114972                | 0.931180  | -0.878784 |
| C    | -4.318182               | 0.770450  | -1.565566 |
| C    | -4.832581               | 1.853548  | -2.271065 |
| C    | -4.142104               | 3.081278  | -2.330358 |
| C    | -2.921417               | 3.253774  | -1.685864 |
| C    | -1.431315               | -4.193275 | -1.567274 |

|    |           |           |           |
|----|-----------|-----------|-----------|
| C  | -0.710849 | -5.175340 | -2.244647 |
| C  | 0.696529  | -5.177662 | -2.243976 |
| C  | 1.419585  | -4.197980 | -1.565912 |
| C  | 2.934299  | 3.244243  | -1.682767 |
| C  | 4.155092  | 3.067791  | -2.325987 |
| C  | 4.841478  | 1.837801  | -2.266048 |
| C  | 4.322790  | 0.756349  | -1.561160 |
| H  | -5.779632 | 1.752174  | -2.792614 |
| H  | -4.834542 | -0.183299 | -1.536904 |
| H  | -4.569792 | 3.903363  | -2.896445 |
| H  | -2.376494 | 4.189896  | -1.748374 |
| H  | 2.392510  | 4.182149  | -1.745789 |
| H  | 4.586067  | 3.888504  | -2.891573 |
| H  | 5.788737  | 1.733354  | -2.786612 |
| H  | 4.835988  | -0.199091 | -1.532026 |
| H  | 2.504475  | -4.183746 | -1.584453 |
| H  | 1.226311  | -5.953796 | -2.788316 |
| H  | -1.242670 | -5.949721 | -2.789496 |
| H  | -2.516133 | -4.175455 | -1.586855 |
| Ir | -0.000514 | 0.152747  | 1.750074  |
| Cl | -0.005837 | -0.218868 | 4.019233  |

### Ir(5)-TdCl

| Atom | Coordinates (Angstroms) |           |           |
|------|-------------------------|-----------|-----------|
|      | X                       | Y         | Z         |
| N    | -2.439052               | -0.956605 | -0.387089 |
| C    | -2.244393               | 0.361816  | -0.219114 |
| C    | -1.400063               | -1.790887 | -0.217812 |
| N    | -0.222289               | -1.472325 | 0.396186  |
| N    | -1.164091               | 0.928910  | 0.394257  |
| C    | 0.808729                | -2.124486 | -0.218078 |
| N    | 2.047703                | -1.634204 | -0.387639 |
| C    | 2.251027                | -0.317094 | -0.219677 |
| N    | 1.386454                | 0.543669  | 0.393909  |
| C    | -0.851102               | 2.107687  | -0.220157 |
| N    | 0.391054                | 2.590110  | -0.389416 |
| C    | 1.435365                | 1.762337  | -0.220455 |
| C    | -2.916794               | 1.419403  | -0.999265 |
| C    | -2.032034               | 2.528092  | -0.999908 |
| C    | -1.174071               | -3.024088 | -0.997037 |
| C    | 0.228432                | -3.235919 | -0.997209 |
| C    | 2.687689                | 1.815347  | -1.000350 |
| C    | 3.205633                | 0.494844  | -0.999873 |
| C    | -4.094805               | 1.444031  | -1.735574 |
| C    | -4.403778               | 2.616453  | -2.437719 |
| C    | -3.529971               | 3.711429  | -2.438341 |
| C    | -2.317822               | 3.670767  | -1.736853 |
| C    | -2.021225               | -3.843146 | -1.733243 |
| C    | -1.450783               | -4.913397 | -2.434762 |
| C    | -0.065571               | -5.122619 | -2.434940 |
| C    | 0.795697                | -4.268625 | -1.733599 |

|    |           |           |           |
|----|-----------|-----------|-----------|
| C  | 3.298094  | 2.822768  | -1.737216 |
| C  | 4.468172  | 2.503783  | -2.438791 |
| C  | 4.979681  | 1.199605  | -2.438359 |
| C  | 4.338334  | 0.170612  | -1.736304 |
| H  | -5.331516 | 2.674764  | -2.998920 |
| H  | -4.753495 | 0.582114  | -1.758728 |
| H  | -3.792981 | 4.602719  | -3.000012 |
| H  | -1.623547 | 4.504259  | -1.760947 |
| H  | 2.880885  | 3.824102  | -1.761153 |
| H  | 4.982625  | 3.277739  | -3.000374 |
| H  | 5.883247  | 0.981434  | -2.999621 |
| H  | 4.713169  | -0.847360 | -1.759569 |
| H  | 1.871474  | -4.408050 | -1.757375 |
| H  | 0.347461  | -5.955377 | -2.996158 |
| H  | -2.091484 | -5.586994 | -2.995846 |
| H  | -3.090198 | -3.658624 | -1.756750 |
| Cl | 0.001660  | 0.008976  | 4.272016  |
| Ir | 0.000143  | -0.000941 | 1.946072  |

### Ni-TdCl

| Atom | Coordinates (Angstroms) |           |           |
|------|-------------------------|-----------|-----------|
|      | X                       | Y         | Z         |
| N    | -1.935894               | 1.771348  | 0.053902  |
| C    | -0.678579               | 2.204302  | 0.232973  |
| C    | -2.255754               | 0.480568  | 0.232534  |
| N    | -1.414707               | -0.447269 | 0.800613  |
| N    | 0.320040                | 1.448903  | 0.801356  |
| C    | -1.569535               | -1.689826 | 0.232277  |
| N    | -0.565895               | -2.562198 | 0.053479  |
| C    | 0.711836                | -2.193784 | 0.232586  |
| N    | 1.094700                | -1.001691 | 0.801107  |
| C    | 1.544146                | 1.713413  | 0.233434  |
| N    | 2.502105                | 0.791068  | 0.054695  |
| C    | 2.248386                | -0.514345 | 0.233248  |
| C    | -0.005998               | 3.283759  | -0.484457 |
| C    | 1.388996                | 2.975638  | -0.484254 |
| C    | -3.271223               | -0.284936 | -0.485230 |
| C    | -2.840578               | -1.647110 | -0.485304 |
| C    | 2.847102                | -1.636283 | -0.484473 |
| C    | 1.882825                | -2.690392 | -0.484737 |
| C    | -0.489494               | 4.390270  | -1.186750 |
| C    | 0.427262                | 5.197799  | -1.853414 |
| C    | 1.802583                | 4.894050  | -1.853186 |
| C    | 2.293756                | 3.775549  | -1.186322 |
| C    | -4.416233               | 0.098613  | -1.187495 |
| C    | -5.139261               | -0.886057 | -1.854317 |
| C    | -4.714710               | -2.229013 | -1.854353 |
| C    | -3.557036               | -2.619138 | -1.187585 |
| C    | 4.047323                | -1.770594 | -1.186439 |
| C    | 4.288592                | -2.968191 | -1.853173 |
| C    | 3.337928                | -4.007428 | -1.853456 |

|    |           |           |           |
|----|-----------|-----------|-----------|
| C  | 2.123456  | -3.873732 | -1.186985 |
| H  | 0.078054  | 6.075026  | -2.389542 |
| H  | -1.551846 | 4.609690  | -1.203820 |
| H  | 2.488930  | 5.542603  | -2.389105 |
| H  | 3.349703  | 3.527114  | -1.203012 |
| H  | 4.768514  | -0.960264 | -1.203024 |
| H  | 5.223116  | -3.104280 | -2.388945 |
| H  | 3.556631  | -4.925965 | -2.389518 |
| H  | 1.380384  | -4.664033 | -1.204089 |
| H  | -3.215891 | -3.648877 | -1.204486 |
| H  | -5.299779 | -2.970091 | -2.390454 |
| H  | -6.044017 | -0.615958 | -2.390384 |
| H  | -4.729071 | 1.137302  | -1.204309 |
| Ni | -0.000291 | -0.000208 | 1.907902  |
| Cl | -0.001987 | -0.000961 | 4.041921  |

### Cu-TdCl

| Atom | Coordinates (Angstroms) |           |           |
|------|-------------------------|-----------|-----------|
|      | X                       | Y         | Z         |
| N    | -2.217063               | 1.437419  | -0.001839 |
| C    | -1.036635               | 2.046024  | 0.163787  |
| C    | -2.290653               | 0.111228  | 0.162831  |
| N    | -1.301365               | -0.664502 | 0.714072  |
| N    | 0.075284                | 1.459399  | 0.715212  |
| C    | -1.253221               | -1.920702 | 0.162743  |
| N    | -0.135842               | -2.638757 | -0.002094 |
| C    | 1.049354                | -2.039469 | 0.163468  |
| N    | 1.226228                | -0.794852 | 0.714996  |
| C    | 1.241734                | 1.928435  | 0.164033  |
| N    | 2.353412                | 1.201653  | -0.001115 |
| C    | 2.290176                | -0.125032 | 0.163885  |
| C    | -0.547822               | 3.245619  | -0.507138 |
| C    | 0.879263                | 3.171975  | -0.506943 |
| C    | -3.186092               | -0.824463 | -0.508494 |
| C    | -2.536238               | -2.097158 | -0.508654 |
| C    | 3.084941                | -1.147840 | -0.507077 |
| C    | 2.307706                | -2.346968 | -0.507422 |
| C    | -1.206958               | 4.291961  | -1.157477 |
| C    | -0.433454               | 5.266674  | -1.779972 |
| C    | 0.974073                | 5.193989  | -1.779839 |
| C    | 1.642870                | 4.144774  | -1.157201 |
| C    | -4.410326               | -0.649677 | -1.158865 |
| C    | -4.984363               | -1.753498 | -1.781668 |
| C    | -4.343415               | -3.008736 | -1.781845 |
| C    | -3.112608               | -3.191161 | -1.159216 |
| C    | 4.320783                | -1.099750 | -1.157191 |
| C    | 4.778575                | -2.256753 | -1.779760 |
| C    | 4.012037                | -3.439480 | -1.780032 |
| C    | 2.768805                | -3.494444 | -1.157748 |
| H    | -0.920734               | 6.097229  | -2.281570 |
| H    | -2.290767               | 4.335897  | -1.171399 |

|    |           |           |           |
|----|-----------|-----------|-----------|
| H  | 1.544440  | 5.969958  | -2.281253 |
| H  | 2.725442  | 4.076812  | -1.170843 |
| H  | 4.900570  | -0.182999 | -1.170721 |
| H  | 5.741662  | -2.249788 | -2.281034 |
| H  | 4.399124  | -4.321237 | -2.281562 |
| H  | 2.168869  | -4.398130 | -1.171743 |
| H  | -2.608697 | -4.151709 | -1.173054 |
| H  | -4.818939 | -3.846032 | -2.283518 |
| H  | -5.941484 | -1.647588 | -2.283232 |
| H  | -4.892870 | 0.321783  | -1.172497 |
| Cl | -0.003214 | -0.001954 | 4.043371  |
| Cu | -0.000266 | -0.000233 | 1.902940  |

### Fe(3)-Tdpv

| Atom | Coordinates (Angstroms) |           |           |
|------|-------------------------|-----------|-----------|
|      | X                       | Y         | Z         |
| N    | 1.750061                | 0.000564  | 1.423874  |
| C    | 1.305159                | 1.183601  | 0.965149  |
| C    | 1.305708                | -1.182730 | 0.965193  |
| N    | 0.573443                | -1.370831 | -0.190305 |
| N    | 0.572850                | 1.371287  | -0.190394 |
| C    | -0.380569               | -2.335058 | -0.006109 |
| N    | -1.604042               | -2.288348 | -0.562361 |
| C    | -2.057306               | -1.137620 | -1.083370 |
| N    | -1.296314               | -0.000276 | -1.274028 |
| C    | -0.381676               | 2.335013  | -0.006264 |
| N    | -1.605120               | 2.287679  | -0.562497 |
| C    | -2.057841               | 1.136697  | -1.083454 |
| C    | 1.067824                | 2.366490  | 1.796285  |
| C    | 0.004875                | 3.094202  | 1.181953  |
| C    | 1.068993                | -2.365681 | 1.796391  |
| C    | 0.006393                | -3.093970 | 1.182126  |
| C    | -3.454764               | 0.711856  | -1.140566 |
| C    | -3.454423               | -0.713429 | -1.140498 |
| C    | 1.592109                | 2.779399  | 3.023005  |
| C    | 1.081867                | 3.937249  | 3.605698  |
| C    | 0.033672                | 4.654742  | 2.999503  |
| C    | -0.527116               | 4.229448  | 1.797470  |
| C    | 1.593517                | -2.778269 | 3.023130  |
| C    | 1.083861                | -3.936320 | 3.605905  |
| C    | 0.035998                | -4.654382 | 2.999774  |
| C    | -0.525017               | -4.229454 | 1.797734  |
| C    | -4.656212               | 1.421783  | -1.091828 |
| C    | -5.848994               | 0.702348  | -1.079934 |
| C    | -5.848656               | -0.705072 | -1.079853 |
| C    | -4.655528               | -1.423934 | -1.091668 |
| H    | 1.490494                | 4.288356  | 4.548942  |
| H    | 2.378314                | 2.206308  | 3.504042  |
| H    | -0.349459               | 5.548049  | 3.484337  |
| H    | -1.356226               | 4.762787  | 1.343481  |



---

|    |           |           |           |
|----|-----------|-----------|-----------|
| H  | -4.651728 | 2.506659  | -1.064490 |
| H  | -6.796123 | 1.233763  | -1.061248 |
| H  | -6.795530 | -1.236940 | -1.061107 |
| H  | -4.650527 | -2.508804 | -1.064223 |
| H  | -1.353867 | -4.763230 | 1.343780  |
| H  | -0.346672 | -5.547842 | 3.484689  |
| H  | 1.492668  | -4.287170 | 4.549166  |
| H  | 2.379446  | -2.204746 | 3.504102  |
| C  | 3.089607  | -1.159870 | -2.256881 |
| C  | 4.393525  | -1.200343 | -2.734066 |
| C  | 5.058300  | 0.000429  | -2.982467 |
| C  | 4.392608  | 1.201160  | -2.736461 |
| C  | 3.088721  | 1.160583  | -2.259130 |
| N  | 2.438078  | 0.000358  | -2.024007 |
| H  | 6.078046  | 0.000440  | -3.354325 |
| H  | 2.537607  | -2.064361 | -2.025027 |
| H  | 4.875270  | -2.157192 | -2.901430 |
| H  | 4.873579  | 2.158063  | -2.905720 |
| H  | 2.536108  | 2.065142  | -2.028958 |
| Fe | 0.528004  | 0.000172  | -1.478406 |

**Fe(5)-Tdpv**

| Atom | Coordinates (Angstroms) |           |           |
|------|-------------------------|-----------|-----------|
|      | X                       | Y         | Z         |
| N    | 0.300424                | -2.550389 | -0.659830 |
| C    | 0.814871                | -1.646288 | -1.513597 |
| C    | -0.414108               | -2.161657 | 0.411754  |
| N    | -0.917153               | -0.897512 | 0.607507  |
| N    | 0.447632                | -0.323603 | -1.568964 |
| C    | -0.870819               | -0.555750 | 1.936606  |
| N    | -0.618637               | 0.682965  | 2.398999  |
| C    | -0.124040               | 1.627519  | 1.578305  |
| N    | -0.081721               | 1.526240  | 0.210652  |
| C    | 1.532317                | 0.465726  | -1.860292 |
| N    | 1.742295                | 1.696110  | -1.356105 |
| C    | 1.045492                | 2.129460  | -0.290035 |
| C    | 2.114663                | -1.752146 | -2.175119 |
| C    | 2.567836                | -0.417283 | -2.394983 |
| C    | -0.400187               | -2.814784 | 1.722317  |
| C    | -0.684172               | -1.800743 | 2.684613  |
| C    | 1.567774                | 2.990954  | 0.772823  |
| C    | 0.833184                | 2.670693  | 1.952618  |
| C    | 2.936665                | -2.839941 | -2.480522 |
| C    | 4.184791                | -2.588102 | -3.043504 |
| C    | 4.632091                | -1.270346 | -3.260816 |
| C    | 3.840418                | -0.177217 | -2.919503 |
| C    | -0.067156               | -4.108030 | 2.131386  |
| C    | -0.062217               | -4.390289 | 3.495381  |
| C    | -0.342133               | -3.389533 | 4.444994  |
| C    | -0.632918               | -2.085461 | 4.051007  |
| C    | 2.636816                | 3.887901  | 0.823760  |
| C    | 2.937444                | 4.490622  | 2.043118  |
| C    | 2.212684                | 4.174300  | 3.207505  |
| C    | 1.172018                | 3.248643  | 3.177832  |
| H    | 4.830901                | -3.419313 | -3.311147 |
| H    | 2.601705                | -3.853139 | -2.282635 |
| H    | 5.615673                | -1.107519 | -3.692140 |
| H    | 4.194663                | 0.839557  | -3.056016 |
| H    | 3.213663                | 4.105173  | -0.069564 |
| H    | 3.750382                | 5.208743  | 2.101406  |
| H    | 2.477674                | 4.654199  | 4.145329  |
| H    | 0.631516                | 2.979539  | 4.079729  |
| H    | -0.817512               | -1.304246 | 4.781549  |
| H    | -0.320158               | -3.638734 | 5.502096  |
| H    | 0.171647                | -5.395214 | 3.835111  |

---

|    |           |           |           |
|----|-----------|-----------|-----------|
| H  | 0.179966  | -4.868728 | 1.397699  |
| C  | -4.084932 | -0.010513 | -0.780978 |
| C  | -5.442914 | 0.117466  | -1.040662 |
| C  | -5.855722 | 0.945212  | -2.084576 |
| C  | -4.888730 | 1.617443  | -2.831750 |
| C  | -3.548974 | 1.441913  | -2.508741 |
| N  | -3.143663 | 0.642852  | -1.498719 |
| H  | -6.910224 | 1.063274  | -2.312585 |
| H  | -3.715806 | -0.647115 | 0.016932  |
| H  | -6.158593 | -0.426038 | -0.434142 |
| H  | -5.161994 | 2.270524  | -3.652932 |
| H  | -2.767024 | 1.948832  | -3.065276 |
| Fe | -1.214653 | 0.359805  | -0.861994 |

**Ru(3)-Tdpv**

| Atom | Coordinates (Angstroms) |           |           |
|------|-------------------------|-----------|-----------|
|      | X                       | Y         | Z         |
| N    | -0.040175               | -2.460069 | 0.892601  |
| C    | 0.754759                | -2.263606 | -0.167932 |
| C    | -0.762522               | -1.442358 | 1.389366  |
| N    | -0.974802               | -0.237063 | 0.753509  |
| N    | 0.721819                | -1.145283 | -0.966058 |
| C    | -0.997323               | 0.811633  | 1.651043  |
| N    | -0.509883               | 2.041970  | 1.421398  |
| C    | 0.287469                | 2.268786  | 0.367931  |
| N    | 0.464981                | 1.392315  | -0.672859 |
| C    | 1.971136                | -0.836819 | -1.440041 |
| N    | 2.421058                | 0.410473  | -1.654835 |
| C    | 1.739484                | 1.460286  | -1.165201 |
| C    | 2.028204                | -2.928849 | -0.439262 |
| C    | 2.795580                | -2.030003 | -1.238473 |
| C    | -1.063004               | -1.205953 | 2.797223  |
| C    | -1.210650               | 0.204647  | 2.961023  |
| C    | 2.315897                | 2.708999  | -0.660209 |
| C    | 1.397832                | 3.220109  | 0.305111  |
| C    | 2.582587                | -4.128540 | 0.013146  |
| C    | 3.886054                | -4.438485 | -0.369042 |
| C    | 4.643374                | -3.551334 | -1.157545 |
| C    | 4.114724                | -2.333881 | -1.581825 |
| C    | -1.104042               | -2.057955 | 3.904930  |
| C    | -1.332543               | -1.499035 | 5.159367  |
| C    | -1.477977               | -0.106871 | 5.321070  |
| C    | -1.398243               | 0.756475  | 4.231781  |
| C    | 3.541494                | 3.341231  | -0.879151 |
| C    | 3.823187                | 4.501849  | -0.160748 |
| C    | 2.917439                | 5.006126  | 0.791538  |
| C    | 1.708721                | 4.361527  | 1.047401  |
| H    | 4.331051                | -5.375711 | -0.047182 |
| H    | 2.005784                | -4.797460 | 0.643920  |
| H    | 5.660150                | -3.818936 | -1.430680 |
| H    | 4.705489                | -1.635300 | -2.165775 |
| H    | 4.250452                | 2.934363  | -1.593228 |
| H    | 4.761187                | 5.022977  | -0.330025 |
| H    | 3.171361                | 5.908016  | 1.341223  |
| H    | 1.020869                | 4.731894  | 1.800908  |
| H    | -1.479033               | 1.831585  | 4.356401  |
| H    | -1.644405               | 0.297967  | 6.315247  |
| H    | -1.389466               | -2.144007 | 6.031574  |
| H    | -0.961171               | -3.126615 | 3.780629  |
| C    | -3.984295               | -0.129178 | -0.816796 |
| C    | -5.332171               | -0.109655 | -1.140828 |
| C    | -5.718963               | 0.061240  | -2.473209 |
| C    | -4.716743               | 0.211747  | -3.436188 |

|    |           |           |           |
|----|-----------|-----------|-----------|
| C  | -3.388767 | 0.188368  | -3.040693 |
| N  | -3.002383 | 0.017438  | -1.747405 |
| H  | -6.767133 | 0.078095  | -2.752596 |
| H  | -3.645939 | -0.263586 | 0.204095  |
| H  | -6.067483 | -0.229819 | -0.352310 |
| H  | -4.957564 | 0.349376  | -4.484966 |
| H  | -2.588719 | 0.309152  | -3.766372 |
| Ru | -0.956680 | -0.010306 | -1.190410 |

**Ru(5)-Tdpv**

| Atom | Coordinates (Angstroms) |           |           |
|------|-------------------------|-----------|-----------|
|      | X                       | Y         | Z         |
| N    | -0.149352               | -2.297553 | 1.152297  |
| C    | 0.576849                | -2.288269 | 0.000792  |
| C    | -0.788698               | -1.222462 | 1.564720  |
| N    | -1.115909               | -0.068224 | 0.828777  |
| N    | 0.565135                | -1.237295 | -0.910864 |
| C    | -0.839688               | 1.041399  | 1.649757  |
| N    | -0.252580               | 2.173672  | 1.321744  |
| C    | 0.471616                | 2.288881  | 0.174324  |
| N    | 0.507388                | 1.313909  | -0.817084 |
| C    | 1.800741                | -1.058177 | -1.451154 |
| N    | 2.316524                | 0.117080  | -1.882395 |
| C    | 1.749734                | 1.232398  | -1.362897 |
| C    | 1.790664                | -3.046371 | -0.246710 |
| C    | 2.565815                | -2.282436 | -1.171131 |
| C    | -0.976709               | -0.854935 | 2.986448  |
| C    | -1.008491               | 0.559473  | 3.039625  |
| C    | 2.460989                | 2.462477  | -0.983781 |
| C    | 1.651346                | 3.117029  | -0.006522 |
| C    | 2.304541                | -4.228178 | 0.293348  |
| C    | 3.566763                | -4.653560 | -0.125510 |
| C    | 4.326252                | -3.900400 | -1.036823 |
| C    | 3.838897                | -2.694228 | -1.550942 |
| C    | -1.001681               | -1.613523 | 4.148170  |
| C    | -1.106612               | -0.938804 | 5.374548  |
| C    | -1.137966               | 0.457838  | 5.427078  |
| C    | -1.065465               | 1.226767  | 4.254984  |
| C    | 3.715537                | 2.957853  | -1.323387 |
| C    | 4.148806                | 4.139726  | -0.713327 |
| C    | 3.355487                | 4.785000  | 0.250384  |
| C    | 2.112161                | 4.273579  | 0.627681  |
| H    | 3.975124                | -5.580427 | 0.267530  |
| H    | 1.731282                | -4.798697 | 1.017133  |
| H    | 5.308813                | -4.254354 | -1.334587 |
| H    | 4.432776                | -2.088651 | -2.228368 |
| H    | 4.336664                | 2.433900  | -2.043113 |
| H    | 5.115579                | 4.558295  | -0.977019 |
| H    | 3.722271                | 5.694800  | 0.717354  |
| H    | 1.513224                | 4.759799  | 1.391134  |
| H    | -1.051074               | 2.311216  | 4.291974  |
| H    | -1.206411               | 0.955824  | 6.389888  |
| H    | -1.151079               | -1.510246 | 6.297128  |
| H    | -0.938746               | -2.695956 | 4.103683  |
| C    | -4.062809               | -0.020131 | -0.709995 |
| C    | -5.415485               | -0.011726 | -1.012456 |
| C    | -5.824322               | 0.040761  | -2.348647 |
| C    | -4.837011               | 0.084004  | -3.337572 |
| C    | -3.502437               | 0.073596  | -2.964349 |
| N    | -3.095020               | 0.021388  | -1.666596 |
| H    | -6.877007               | 0.048102  | -2.611022 |
| H    | -3.702259               | -0.061094 | 0.311602  |
| H    | -6.138574               | -0.046517 | -0.204296 |
| H    | -5.094603               | 0.126092  | -4.390634 |
| H    | -2.713200               | 0.107491  | -3.710433 |

|    |           |          |           |
|----|-----------|----------|-----------|
| Ru | -1.043387 | 0.007139 | -1.139751 |
|----|-----------|----------|-----------|

**Os(3)-Tdpv**

| Atom | Coordinates (Angstroms) |           |          |
|------|-------------------------|-----------|----------|
|      | X                       | Y         | Z        |
| N    | 0.069109                | 2.272271  | 1.358543 |
| C    | -0.606954               | 2.290548  | 0.204100 |
| C    | 0.637900                | 1.140272  | 1.798159 |
| N    | 0.821532                | -0.001521 | 1.036191 |

|    |           |           |           |
|----|-----------|-----------|-----------|
| N  | -0.580328 | 1.273799  | -0.729188 |
| C  | 0.636068  | -1.143671 | 1.796855  |
| N  | 0.065918  | -2.274541 | 1.355882  |
| C  | -0.609801 | -2.290441 | 0.201220  |
| N  | -0.581334 | -1.272788 | -0.731060 |
| C  | -1.791736 | 1.162793  | -1.372131 |
| N  | -2.318209 | 0.002291  | -1.792534 |
| C  | -1.792890 | -1.159254 | -1.373848 |
| C  | -1.769055 | 3.112051  | -0.117063 |
| C  | -2.514861 | 2.403298  | -1.105888 |
| C  | 0.747017  | 0.711056  | 3.186231  |
| C  | 0.745814  | -0.716234 | 3.185424  |
| C  | -2.517583 | -2.399177 | -1.109216 |
| C  | -1.772901 | -3.110051 | -0.121119 |
| C  | -2.258975 | 4.302748  | 0.425691  |
| C  | -3.471316 | 4.794749  | -0.051653 |
| C  | -4.207441 | 4.095153  | -1.027426 |
| C  | -3.748320 | 2.887586  | -1.548230 |
| C  | 0.734781  | 1.421308  | 4.390112  |
| C  | 0.761567  | 0.700400  | 5.580866  |
| C  | 0.760406  | -0.708455 | 5.580051  |
| C  | 0.732418  | -1.427905 | 4.388445  |
| C  | -3.751654 | -2.881279 | -1.552270 |
| C  | -4.212453 | -4.088827 | -1.032928 |
| C  | -3.477395 | -4.790541 | -0.057861 |
| C  | -2.264474 | -4.300708 | 0.420223  |
| H  | -3.862453 | 5.729293  | 0.339954  |
| H  | -1.701953 | 4.825432  | 1.196591  |
| H  | -5.153915 | 4.502093  | -1.371469 |
| H  | -4.326312 | 2.332756  | -2.280263 |
| H  | -4.328783 | -2.324813 | -2.283740 |
| H  | -5.159421 | -4.494112 | -1.377567 |
| H  | -3.869844 | -5.725015 | 0.332596  |
| H  | -1.708244 | -4.825001 | 1.190601  |
| H  | 0.702297  | -2.512661 | 4.384194  |
| H  | 0.771448  | -1.240155 | 6.527082  |
| H  | 0.773478  | 1.230970  | 6.528520  |
| H  | 0.706465  | 2.506116  | 4.387177  |
| C  | 3.948065  | -0.000538 | -0.480556 |
| C  | 5.278160  | -0.001091 | -0.835155 |
| C  | 5.657098  | -0.000777 | -2.189133 |
| C  | 4.628846  | 0.000416  | -3.146590 |
| C  | 3.311583  | 0.001014  | -2.747409 |
| N  | 2.922149  | 0.000172  | -1.414403 |
| H  | 6.700199  | -0.001257 | -2.483156 |
| H  | 3.628427  | -0.000676 | 0.554172  |
| H  | 6.024421  | -0.001757 | -0.046941 |
| H  | 4.852153  | 0.000975  | -4.208768 |
| H  | 2.503734  | 0.002128  | -3.474856 |
| Os | 0.970855  | -0.000378 | -0.910941 |



**Os(5)-Tdpv**

| Atom | Coordinates (Angstroms) |           |           |
|------|-------------------------|-----------|-----------|
|      | X                       | Y         | Z         |
| N    | 0.040000                | 2.198607  | 1.451050  |
| C    | -0.605030               | 2.286361  | 0.256784  |
| C    | 0.624485                | 1.084590  | 1.834824  |
| N    | 0.950397                | -0.033245 | 1.038074  |
| N    | -0.575163               | 1.279671  | -0.714123 |
| C    | 0.614994                | -1.188474 | 1.774623  |
| N    | 0.021499                | -2.275999 | 1.333128  |
| C    | -0.625111               | -2.294657 | 0.136335  |
| N    | -0.586316               | -1.238833 | -0.780184 |
| C    | -1.782178               | 1.185561  | -1.345306 |

---

|    |           |           |           |
|----|-----------|-----------|-----------|
| N  | -2.300649 | 0.058228  | -1.884700 |
| C  | -1.792465 | -1.100765 | -1.404857 |
| C  | -1.767378 | 3.102973  | -0.031264 |
| C  | -2.509257 | 2.422545  | -1.044806 |
| C  | 0.735972  | 0.618436  | 3.232926  |
| C  | 0.730260  | -0.797694 | 3.195519  |
| C  | -2.531296 | -2.344376 | -1.168387 |
| C  | -1.795336 | -3.083961 | -0.192612 |
| C  | -2.270531 | 4.274583  | 0.540530  |
| C  | -3.484957 | 4.774038  | 0.066358  |
| C  | -4.210568 | 4.104113  | -0.933395 |
| C  | -3.737192 | 2.908515  | -1.482950 |
| C  | 0.729378  | 1.300091  | 4.441573  |
| C  | 0.760694  | 0.545634  | 5.624742  |
| C  | 0.755080  | -0.851722 | 5.587789  |
| C  | 0.717945  | -1.542259 | 4.366350  |
| C  | -3.764246 | -2.795018 | -1.629817 |
| C  | -4.248737 | -4.013018 | -1.142853 |
| C  | -3.528904 | -4.741250 | -0.180315 |
| C  | -2.309398 | -4.278966 | 0.317812  |
| H  | -3.882650 | 5.694428  | 0.484403  |
| H  | -1.724624 | 4.781072  | 1.329934  |
| H  | -5.156790 | 4.514585  | -1.272891 |
| H  | -4.307178 | 2.366560  | -2.230955 |
| H  | -4.329465 | -2.209310 | -2.347858 |
| H  | -5.199139 | -4.396084 | -1.502137 |
| H  | -3.935217 | -5.678338 | 0.189569  |
| H  | -1.767857 | -4.831219 | 1.079033  |
| H  | 0.677981  | -2.626087 | 4.332494  |
| H  | 0.767096  | -1.411800 | 6.518155  |
| H  | 0.777027  | 1.055634  | 6.583413  |
| H  | 0.698239  | 2.384482  | 4.465164  |
| C  | 3.953674  | 0.003642  | -0.477326 |
| C  | 5.285913  | 0.012703  | -0.822683 |
| C  | 5.674893  | 0.047349  | -2.173824 |
| C  | 4.652659  | 0.071575  | -3.137721 |
| C  | 3.332669  | 0.061069  | -2.747960 |
| N  | 2.933244  | 0.027565  | -1.417926 |
| H  | 6.720015  | 0.055013  | -2.460603 |
| H  | 3.623925  | -0.022583 | 0.553799  |
| H  | 6.026816  | -0.007397 | -0.029509 |
| H  | 4.883112  | 0.098480  | -4.198121 |
| H  | 2.529139  | 0.079006  | -3.479548 |
| Os | 0.981346  | 0.018578  | -0.920422 |

**Co-Tdpy**

| Atom | Coordinates (Angstroms) |           |           |
|------|-------------------------|-----------|-----------|
|      | X                       | Y         | Z         |
| N    | -0.091582               | 1.106840  | -2.373576 |
| C    | -0.527423               | 1.776215  | -1.290734 |
| C    | 0.290076                | -0.180246 | -2.293929 |
| N    | 0.037293                | -1.011361 | -1.229238 |
| N    | -0.893651               | 1.193429  | -0.101110 |
| C    | 1.091050                | -1.864716 | -1.013602 |
| N    | 1.513985                | -2.272193 | 0.196912  |
| C    | 1.102962                | -1.655716 | 1.319961  |
| N    | 0.050679                | -0.776635 | 1.391051  |
| C    | -0.516154               | 1.978069  | 0.962328  |
| N    | -0.068757               | 1.511249  | 2.142384  |
| C    | 0.313317                | 0.230155  | 2.288622  |
| C    | -0.255870               | 3.184439  | -0.998909 |
| C    | -0.248734               | 3.311764  | 0.422190  |
| C    | 1.392405                | -0.786840 | -3.042699 |
| C    | 1.897868                | -1.848502 | -2.235209 |
| C    | 1.423611                | -0.234735 | 3.122131  |

---

|    |           |           |           |
|----|-----------|-----------|-----------|
| C  | 1.921938  | -1.423435 | 2.511132  |
| C  | 0.078790  | 4.271203  | -1.810088 |
| C  | 0.374955  | 5.487015  | -1.198902 |
| C  | 0.381957  | 5.612666  | 0.203327  |
| C  | 0.092965  | 4.525154  | 1.023854  |
| C  | 2.025918  | -0.441452 | -4.238245 |
| C  | 3.132373  | -1.186127 | -4.640065 |
| C  | 3.631141  | -2.233722 | -3.843264 |
| C  | 3.034109  | -2.559114 | -2.627563 |
| C  | 2.068676  | 0.317088  | 4.230878  |
| C  | 3.179770  | -0.345262 | 4.747575  |
| C  | 3.671533  | -1.518200 | 4.144672  |
| C  | 3.062706  | -2.053969 | 3.012180  |
| H  | 0.615415  | 6.351384  | -1.811267 |
| H  | 0.103849  | 4.162628  | -2.889694 |
| H  | 0.627690  | 6.571928  | 0.649847  |
| H  | 0.128828  | 4.610281  | 2.105256  |
| H  | 1.705657  | 1.238755  | 4.674337  |
| H  | 3.683020  | 0.053314  | 5.623820  |
| H  | 4.546355  | -2.005665 | 4.565379  |
| H  | 3.457885  | -2.940349 | 2.526287  |
| H  | 3.434901  | -3.345384 | -1.995837 |
| H  | 4.502138  | -2.789003 | -4.179359 |
| H  | 3.626513  | -0.950080 | -5.578169 |
| H  | 1.657724  | 0.387084  | -4.834790 |
| C  | -3.620201 | -2.533565 | 0.226025  |
| C  | -4.961107 | -2.894839 | 0.261364  |
| C  | -5.930671 | -1.894380 | 0.190160  |
| C  | -5.519901 | -0.566172 | 0.085946  |
| C  | -4.159696 | -0.284286 | 0.056542  |
| N  | -3.218539 | -1.249480 | 0.125356  |
| H  | -6.986129 | -2.146109 | 0.215418  |
| H  | -2.834090 | -3.280015 | 0.278624  |
| H  | -5.233507 | -3.941076 | 0.343049  |
| H  | -6.237624 | 0.244358  | 0.027756  |
| H  | -3.790530 | 0.733083  | -0.023874 |
| Co | -1.292010 | -0.651816 | 0.066174  |

**Rh-Tdpy**

| Atom | Coordinates (Angstroms) |           |           |
|------|-------------------------|-----------|-----------|
|      | X                       | Y         | Z         |
| N    | -0.427676               | 0.184152  | -2.647486 |
| C    | -0.352330               | -1.025630 | -2.068209 |
| C    | -0.295159               | 1.299504  | -1.910181 |
| N    | 0.168156                | 1.334326  | -0.620890 |
| N    | 0.103856                | -1.257204 | -0.796702 |
| C    | -0.468287               | 2.301267  | 0.112081  |
| N    | -0.774248               | 2.196332  | 1.416626  |
| C    | -0.701699               | 1.007017  | 2.037061  |
| N    | -0.093653               | -0.108252 | 1.521273  |
| C    | -0.580675               | -2.283016 | -0.199685 |
| N    | -0.885383               | -2.341301 | 1.108000  |
| C    | -0.757089               | -1.251787 | 1.883638  |
| C    | -1.118140               | -2.213228 | -2.453839 |
| C    | -1.262501               | -3.005737 | -1.275819 |
| C    | -1.001697               | 2.563880  | -2.128730 |
| C    | -1.111222               | 3.195356  | -0.853601 |
| C    | -1.624069               | -0.886915 | 3.006137  |
| C    | -1.589068               | 0.536416  | 3.102857  |
| C    | -1.753852               | -2.583704 | -3.641302 |
| C    | -2.494734               | -3.763552 | -3.654009 |
| C    | -2.637213               | -4.545529 | -2.491629 |
| C    | -2.041929               | -4.164960 | -1.290827 |

|    |           |           |           |
|----|-----------|-----------|-----------|
| C  | -1.615015 | 3.122358  | -3.252767 |
| C  | -2.297850 | 4.327489  | -3.102736 |
| C  | -2.405972 | 4.950544  | -1.844534 |
| C  | -1.833587 | 4.382250  | -0.708518 |
| C  | -2.473293 | -1.633803 | 3.826171  |
| C  | -3.250008 | -0.956915 | 4.764004  |
| C  | -3.215415 | 0.447579  | 4.859488  |
| C  | -2.403375 | 1.206218  | 4.019217  |
| H  | -2.979767 | -4.082933 | -4.572148 |
| H  | -1.666628 | -1.963182 | -4.527619 |
| H  | -3.229879 | -5.455108 | -2.532342 |
| H  | -2.174580 | -4.749481 | -0.385843 |
| H  | -2.519756 | -2.713975 | 3.729872  |
| H  | -3.901329 | -1.518824 | 5.427528  |
| H  | -3.840599 | 0.945803  | 5.595112  |
| H  | -2.396495 | 2.290452  | 4.070064  |
| H  | -1.940655 | 4.844283  | 0.267866  |
| H  | -2.953812 | 5.884823  | -1.759450 |
| H  | -2.763991 | 4.791557  | -3.967372 |
| H  | -1.555218 | 2.624327  | -4.215375 |
| C  | 4.385622  | 1.059730  | 0.289584  |
| C  | 5.775000  | 1.085673  | 0.338212  |
| C  | 6.471770  | -0.121852 | 0.384071  |
| C  | 5.747252  | -1.313877 | 0.378069  |
| C  | 4.358898  | -1.257494 | 0.328248  |
| N  | 3.680587  | -0.091276 | 0.285878  |
| H  | 7.556523  | -0.133783 | 0.422477  |
| H  | 3.804684  | 1.975476  | 0.250302  |
| H  | 6.293420  | 2.038239  | 0.338807  |
| H  | 6.243611  | -2.277586 | 0.410456  |
| H  | 3.757505  | -2.160754 | 0.319552  |
| Rh | 1.491985  | -0.058232 | 0.189923  |

**Ir-Tdpy**

| Atom | Coordinates (Angstroms) |           |           |
|------|-------------------------|-----------|-----------|
|      | X                       | Y         | Z         |
| N    | -1.245034               | 0.029590  | 2.121503  |
| C    | -0.880981               | -1.144524 | 1.581001  |
| C    | -0.887523               | 1.189115  | 1.544324  |
| N    | -0.380209               | 1.307188  | 0.276061  |
| N    | -0.368816               | -1.299599 | 0.317567  |
| C    | 0.555849                | 2.304700  | 0.203192  |
| N    | 1.645567                | 2.265517  | -0.581259 |
| C    | 2.027211                | 1.121937  | -1.166732 |
| N    | 1.253970                | -0.018652 | -1.255787 |
| C    | 0.570874                | -2.294822 | 0.277430  |
| N    | 1.660792                | -2.276338 | -0.507937 |
| C    | 2.035367                | -1.150535 | -1.130901 |
| C    | -0.524910               | -2.358176 | 2.318464  |
| C    | 0.392561                | -3.081353 | 1.498018  |
| C    | -0.534660               | 2.425813  | 2.244207  |
| C    | 0.377008                | 3.127920  | 1.399303  |
| C    | 3.410644                | -0.726275 | -1.376666 |
| C    | 3.405501                | 0.699574  | -1.399142 |
| C    | -0.824634               | -2.801604 | 3.608963  |
| C    | -0.238270               | -3.984313 | 4.054031  |
| C    | 0.666177                | -4.698019 | 3.244188  |
| C    | 1.004681                | -4.244689 | 1.971221  |
| C    | -0.832612               | 2.906968  | 3.521563  |
| C    | -0.250560               | 4.105434  | 3.928545  |
| C    | 0.648146                | 4.798345  | 3.094581  |
| C    | 0.985108                | 4.307933  | 1.835043  |
| C    | 4.612470                | -1.434354 | -1.458934 |
| C    | 5.794206                | -0.712734 | -1.606679 |
| C    | 5.789128                | 0.695793  | -1.628950 |

---

|    |           |           |           |
|----|-----------|-----------|-----------|
| C  | 4.602237  | 1.413257  | -1.503953 |
| H  | -0.473396 | -4.359642 | 5.045974  |
| H  | -1.499276 | -2.233916 | 4.242005  |
| H  | 1.113444  | -5.611787 | 3.624996  |
| H  | 1.723388  | -4.776551 | 1.355866  |
| H  | 4.615068  | -2.518602 | -1.411908 |
| H  | 6.738440  | -1.242035 | -1.697210 |
| H  | 6.729551  | 1.228733  | -1.736270 |
| H  | 4.597055  | 2.498436  | -1.491186 |
| H  | 1.699617  | 4.824027  | 1.201628  |
| H  | 1.092185  | 5.725363  | 3.446003  |
| H  | -0.484478 | 4.509684  | 4.909352  |
| H  | -1.502439 | 2.355588  | 4.173859  |
| C  | -3.511499 | 1.133185  | -1.600937 |
| C  | -4.895644 | 1.166796  | -1.692456 |
| C  | -5.598388 | -0.030208 | -1.840008 |
| C  | -4.877869 | -1.224458 | -1.884456 |
| C  | -3.493934 | -1.185131 | -1.785837 |
| N  | -2.806768 | -0.024863 | -1.643045 |
| H  | -6.680681 | -0.031768 | -1.921045 |
| H  | -2.922845 | 2.035978  | -1.488693 |
| H  | -5.408210 | 2.121544  | -1.651039 |
| H  | -5.375923 | -2.181173 | -1.996874 |
| H  | -2.891796 | -2.085362 | -1.819104 |
| Ir | -0.734290 | -0.027167 | -1.316450 |



### Zn-Tdpy

| Atom | Coordinates (Angstroms) |           |           |
|------|-------------------------|-----------|-----------|
|      | X                       | Y         | Z         |
| N    | -0.026544               | 1.300283  | -2.274655 |
| C    | -0.286215               | -0.021006 | -2.303132 |
| C    | 0.347152                | 1.922124  | -1.139730 |
| N    | 0.805686                | 1.300665  | -0.005939 |
| N    | 0.071502                | -0.923075 | -1.334848 |
| C    | 0.343525                | 1.935350  | 1.118957  |
| N    | -0.033716               | 1.326845  | 2.259963  |
| C    | -0.293422               | 0.005967  | 2.303046  |
| N    | 0.067410                | -0.907382 | 1.346567  |
| C    | -0.902366               | -1.871998 | -1.164823 |
| N    | -1.261301               | -2.419291 | 0.012599  |
| C    | -0.905958               | -1.858300 | 1.184598  |
| C    | -1.363284               | -0.645860 | -3.075640 |
| C    | -1.752486               | -1.814258 | -2.356852 |
| C    | -0.097463               | 3.256865  | -0.732056 |
| C    | -0.099763               | 3.265216  | 0.694269  |
| C    | -1.759739               | -1.786679 | 2.373271  |
| C    | -1.372845               | -0.609901 | 3.079495  |
| C    | -2.070905               | -0.242012 | -4.209723 |
| C    | -3.130825               | -1.033877 | -4.645134 |
| C    | -3.515100               | -2.187272 | -3.935478 |
| C    | -2.847447               | -2.573037 | -2.775528 |
| C    | -0.588783               | 4.350609  | -1.448605 |
| C    | -1.032820               | 5.462427  | -0.737311 |
| C    | -1.035077               | 5.470673  | 0.670712  |
| C    | -0.593348               | 4.367263  | 1.396392  |
| C    | -2.855952               | -2.540592 | 2.797412  |
| C    | -3.527210               | -2.141315 | 3.950693  |
| C    | -3.145199               | -0.979644 | 4.647960  |
| C    | -2.083989               | -0.192834 | 4.206565  |
| H    | -3.678821               | -0.753093 | -5.540060 |
| H    | -1.793630               | 0.666711  | -4.734419 |
| H    | -4.353404               | -2.777632 | -4.294298 |
| H    | -3.162449               | -3.441913 | -2.206476 |

---

|    |           |           |           |
|----|-----------|-----------|-----------|
| H  | -3.169145 | -3.416109 | 2.237618  |
| H  | -4.366584 | -2.727505 | 4.313821  |
| H  | -3.695973 | -0.688439 | 5.537836  |
| H  | -1.808383 | 0.722008  | 4.721413  |
| H  | -0.626501 | 4.356189  | 2.481196  |
| H  | -1.398969 | 6.348816  | 1.196540  |
| H  | -1.395012 | 6.334344  | -1.274550 |
| H  | -0.618457 | 4.326845  | -2.533306 |
| C  | 4.188602  | 0.110322  | 0.005552  |
| C  | 5.568525  | -0.052165 | 0.007487  |
| C  | 6.093315  | -1.343954 | 0.014060  |
| C  | 5.217614  | -2.429460 | 0.018462  |
| C  | 3.849460  | -2.186411 | 0.016158  |
| N  | 3.342143  | -0.938659 | 0.009846  |
| H  | 7.167033  | -1.502814 | 0.015713  |
| H  | 3.726910  | 1.092786  | 0.000442  |
| H  | 6.212407  | 0.819932  | 0.003869  |
| H  | 5.582167  | -3.450359 | 0.023589  |
| H  | 3.130826  | -2.999294 | 0.019382  |
| Zn | 1.380125  | -0.530121 | 0.005683  |

**P-Td=O**

| Atom | Coordinates (Angstroms) |           |           |
|------|-------------------------|-----------|-----------|
|      | X                       | Y         | Z         |
| N    | 1.388903                | 2.266395  | 0.302844  |
| C    | 2.042525                | 1.113937  | 0.461149  |
| C    | 0.065328                | 2.325618  | 0.461259  |
| N    | -0.683328               | 1.258683  | 0.973692  |
| N    | 1.431828                | -0.037498 | 0.973736  |
| C    | -1.985918               | 1.211880  | 0.461377  |
| N    | -2.657202               | 0.069614  | 0.303145  |
| C    | -2.046675               | -1.106227 | 0.461417  |
| N    | -0.748330               | -1.221197 | 0.973797  |
| C    | 1.981376                | -1.219328 | 0.461162  |
| N    | 1.268294                | -2.335955 | 0.302815  |
| C    | -0.056552               | -2.325800 | 0.461206  |
| C    | 3.265827                | 0.632961  | -0.141973 |
| C    | 3.228157                | -0.803082 | -0.142017 |
| C    | -0.918617               | 3.197192  | -0.141937 |
| C    | -2.181073               | 2.511722  | -0.141826 |
| C    | -1.084747               | -3.144666 | -0.141990 |
| C    | -2.309603               | -2.394079 | -0.141802 |
| C    | 4.312135                | 1.317544  | -0.769664 |
| C    | 5.322392                | 0.566037  | -1.358415 |
| C    | 5.285380                | -0.844019 | -1.358486 |
| C    | 4.237098                | -1.541548 | -0.769784 |
| C    | -0.783645               | 4.440114  | -0.769883 |
| C    | -1.911882               | 4.998986  | -1.358751 |
| C    | -3.151483               | 4.325929  | -1.358593 |
| C    | -3.297114               | 3.075377  | -0.769600 |
| C    | -1.015035               | -4.392966 | -0.769909 |
| C    | -2.170999               | -4.892030 | -1.358718 |
| C    | -3.373693               | -4.155037 | -1.358492 |
| C    | -3.453648               | -2.898566 | -0.769513 |
| H    | 6.156902                | 1.072369  | -1.832105 |
| H    | 4.333025                | 2.401539  | -0.782996 |
| H    | 6.092200                | -1.393384 | -1.832196 |
| H    | 4.201130                | -2.625147 | -0.783143 |
| H    | -0.086709               | -4.953050 | -0.783385 |
| H    | -2.149752               | -5.867824 | -1.832571 |
| H    | -4.252890               | -4.579039 | -1.832193 |
| H    | -4.374090               | -2.325620 | -0.782738 |
| H    | -4.246280               | 2.551387  | -0.782889 |
| H    | -4.007265               | 4.795330  | -1.832368 |
| H    | -1.839574               | 5.972299  | -1.832666 |

|   |          |           |           |
|---|----------|-----------|-----------|
| H | 0.172749 | 4.950788  | -0.783383 |
| O | 0.000106 | 0.000051  | 3.303210  |
| P | 0.000089 | -0.000003 | 1.838629  |

### Mn(2)-Td=O

| Atom | Coordinates (Angstroms) |           |           |
|------|-------------------------|-----------|-----------|
|      | X                       | Y         | Z         |
| N    | -1.355613               | 2.254698  | 0.237341  |
| C    | -0.027879               | 2.300876  | 0.413846  |
| C    | -2.028409               | 1.109503  | 0.420269  |
| N    | -1.466703               | -0.024111 | 0.968723  |
| N    | 0.711451                | 1.275760  | 0.971700  |
| C    | -1.990314               | -1.176271 | 0.420648  |
| N    | -1.279719               | -2.298410 | 0.237822  |
| C    | 0.048813                | -2.301103 | 0.414663  |
| N    | 0.753931                | -1.251672 | 0.971835  |
| C    | 1.967875                | 1.194206  | 0.410770  |
| N    | 2.632260                | 0.043653  | 0.234797  |
| C    | 2.006948                | -1.128574 | 0.411170  |
| C    | 0.929521                | 3.146495  | -0.289550 |
| C    | 2.180287                | 2.456067  | -0.287092 |
| C    | -3.238075               | 0.660982  | -0.262341 |
| C    | -3.214109               | -0.768370 | -0.262334 |
| C    | 2.261337                | -2.383270 | -0.285676 |
| C    | 1.034072                | -3.114776 | -0.288137 |
| C    | 0.785290                | 4.352253  | -0.980889 |
| C    | 1.898594                | 4.874459  | -1.632149 |
| C    | 3.132215                | 4.194379  | -1.628540 |
| C    | 3.280990                | 2.975916  | -0.973488 |
| C    | -4.245075               | 1.354192  | -0.938375 |
| C    | -5.236490               | 0.616770  | -1.579295 |
| C    | -5.212853               | -0.791057 | -1.579342 |
| C    | -4.197260               | -1.494887 | -0.938491 |
| C    | 3.378814                | -2.866677 | -0.971578 |
| C    | 3.270623                | -4.089602 | -1.626304 |
| C    | 2.060205                | -4.810114 | -1.629986 |
| C    | 0.930051                | -4.324844 | -0.979128 |
| H    | 1.816145                | 5.820462  | -2.158722 |
| H    | -0.171281               | 4.863733  | -1.000118 |
| H    | 3.978391                | 4.627694  | -2.153090 |
| H    | 4.223502                | 2.438802  | -0.987576 |
| H    | 4.303032                | -2.298658 | -0.985649 |
| H    | 4.130812                | -4.494816 | -2.150520 |
| H    | 2.009235                | -5.758511 | -2.156241 |
| H    | -0.009031               | -4.867765 | -0.998404 |
| H    | -4.165054               | -2.579207 | -0.955583 |
| H    | -5.998766               | -1.335067 | -2.094456 |
| H    | -6.040181               | 1.134138  | -2.094421 |
| H    | -4.249206               | 2.438983  | -0.955405 |
| P    | 0.185742                | 0.011528  | 3.629772  |

Mn 0.002647 -0.000029 2.085779

**Mn(4)-Td=O**

| Atom | Coordinates (Angstroms) |           |           |
|------|-------------------------|-----------|-----------|
|      | X                       | Y         | Z         |
| N    | 2.348494                | 1.178425  | 0.229927  |
| C    | 2.291856                | -0.147606 | 0.416768  |
| C    | 1.241669                | 1.921081  | 0.380061  |
| N    | 0.075468                | 1.456053  | 0.934756  |
| N    | 1.217635                | -0.806316 | 0.977528  |
| C    | -1.036834               | 2.038716  | 0.380502  |
| N    | -2.214650               | 1.414526  | 0.231349  |
| C    | -2.295290               | 0.089749  | 0.418472  |
| N    | -1.294725               | -0.676335 | 0.978867  |
| C    | 1.052248                | -2.062161 | 0.437457  |
| N    | -0.138255               | -2.659121 | 0.280357  |
| C    | -1.260617               | -1.942379 | 0.438554  |
| C    | 3.074483                | -1.170341 | -0.267492 |
| C    | 2.298227                | -2.369007 | -0.254640 |
| C    | 0.876675                | 3.133671  | -0.347734 |
| C    | -0.549120               | 3.207398  | -0.347284 |
| C    | -2.531977               | -2.118866 | -0.253000 |
| C    | -3.180123               | -0.846399 | -0.265292 |
| C    | 4.288526                | -1.116422 | -0.957540 |
| C    | 4.732722                | -2.269918 | -1.596417 |
| C    | 3.967078                | -3.452564 | -1.583524 |
| C    | 2.739310                | -3.509492 | -0.931380 |
| C    | 1.636658                | 4.062439  | -1.061863 |
| C    | 0.966857                | 5.078778  | -1.737891 |
| C    | -0.439013               | 5.151515  | -1.737407 |
| C    | -1.209672               | 4.209685  | -1.060910 |
| C    | -3.089079               | -3.207583 | -0.929389 |
| C    | -4.304935               | -3.024009 | -1.580557 |
| C    | -4.944234               | -1.768573 | -1.592836 |
| C    | -4.382632               | -0.667202 | -0.954348 |
| H    | 5.683360                | -2.259481 | -2.120949 |
| H    | 4.864591                | -0.197552 | -0.985297 |
| H    | 4.341364                | -4.332111 | -2.098579 |
| H    | 2.136578                | -4.411518 | -0.939730 |
| H    | -2.582852               | -4.167095 | -0.938190 |
| H    | -4.768561               | -3.860131 | -2.095266 |
| H    | -5.889125               | -1.659874 | -2.116594 |
| H    | -4.860608               | 0.306315  | -0.981757 |
| H    | -2.293685               | 4.249228  | -1.078483 |
| H    | -0.929074               | 5.953975  | -2.280413 |
| H    | 1.536752                | 5.826432  | -2.281207 |
| H    | 2.718958                | 3.989978  | -1.080047 |
| O    | 0.043079                | 0.628406  | 3.657480  |
| Mn   | 0.003328                | 0.034436  | 2.169333  |

**V-Td=O**

| Atom | Coordinates (Angstroms) |           |           |
|------|-------------------------|-----------|-----------|
|      | X                       | Y         | Z         |
| N    | 2.213865                | 1.409217  | 0.318294  |
| C    | 2.290299                | 0.078806  | 0.464804  |
| C    | 1.057338                | 2.066293  | 0.506386  |
| N    | -0.058600               | 1.502310  | 1.088425  |
| N    | 1.298050                | -0.710949 | 1.020133  |
| C    | -1.216391               | 1.976440  | 0.507612  |
| N    | -2.317721               | 1.230347  | 0.320372  |
| C    | -2.289629               | -0.102053 | 0.466603  |
| N    | -1.238085               | -0.811671 | 1.021209  |
| C    | 1.239087                | -1.942651 | 0.407262  |
| N    | 0.103697                | -2.631310 | 0.217058  |
| C    | -1.082531               | -2.034523 | 0.407736  |
| C    | 3.148371                | -0.828890 | -0.291379 |
| C    | 2.490696                | -2.095270 | -0.326314 |
| C    | 0.586993                | 3.238829  | -0.224307 |
| C    | -0.840717               | 3.182354  | -0.223589 |
| C    | -2.318443               | -2.284839 | -0.325559 |
| C    | -3.073765               | -1.074124 | -0.289848 |
| C    | 4.328608                | -0.621030 | -1.009827 |
| C    | 4.862507                | -1.691369 | -1.721225 |
| C    | 4.214302                | -2.941539 | -1.754361 |
| C    | 3.016739                | -3.149956 | -1.077015 |
| C    | 1.258544                | 4.226160  | -0.950782 |
| C    | 0.499865                | 5.170434  | -1.635336 |
| C    | -0.907865               | 5.114749  | -1.634617 |
| C    | -1.588892               | 4.113503  | -0.949348 |
| C    | -2.760024               | -3.377251 | -1.076774 |
| C    | -3.970329               | -3.263311 | -1.753919 |
| C    | -4.714896               | -2.068032 | -1.720051 |
| C    | -4.266804               | -0.959403 | -1.008091 |
| H    | 5.792156                | -1.561408 | -2.267049 |
| H    | 4.812280                | 0.350068  | -1.002885 |
| H    | 4.655391                | -3.752796 | -2.325575 |
| H    | 2.501241                | -4.103550 | -1.121163 |
| H    | -2.171124               | -4.287319 | -1.121507 |
| H    | -4.346278               | -4.106436 | -2.325572 |
| H    | -5.651943               | -2.011342 | -2.265753 |
| H    | -4.825404               | -0.029387 | -1.000570 |
| H    | -2.671990               | 4.052961  | -0.968407 |
| H    | -1.468530               | 5.863798  | -2.185630 |
| H    | 0.999046                | 5.961388  | -2.186922 |
| H    | 2.343022                | 4.251341  | -0.970954 |
| O    | 0.024494                | -0.481584 | 3.818808  |
| V    | 0.002146                | -0.047401 | 2.285422  |

**P-Td**

| Atom | Coordinates (Angstroms) |           |           |
|------|-------------------------|-----------|-----------|
|      | X                       | Y         | Z         |
| N    | 0.730908                | -2.564393 | 0.464379  |
| C    | -0.560252               | -2.246906 | 0.602605  |
| C    | 1.660662                | -1.613834 | 0.602350  |
| N    | 1.382856                | -0.347123 | 1.107773  |
| N    | -0.992083               | -1.024221 | 1.108356  |
| C    | 2.226012                | 0.638314  | 0.602602  |
| N    | 1.855366                | 1.915302  | 0.464793  |
| C    | 0.567304                | 2.245171  | 0.602945  |
| N    | -0.390811               | 1.371313  | 1.108553  |
| C    | -2.227930               | -0.631272 | 0.603025  |
| N    | -2.586299               | 0.649183  | 0.465149  |
| C    | -1.665689               | 1.608587  | 0.603106  |
| C    | -1.732869               | -2.819341 | -0.024742 |
| C    | -2.763074               | -1.821280 | -0.024462 |
| C    | 2.958915                | -1.482078 | -0.024833 |
| C    | 3.308177                | -0.090846 | -0.024649 |
| C    | -1.575337               | 2.910214  | -0.024441 |
| C    | -0.195923               | 3.303477  | -0.024570 |
| C    | -1.926350               | -4.043101 | -0.674339 |
| C    | -3.155929               | -4.270676 | -1.281588 |
| C    | -4.169021               | -3.289197 | -1.281288 |
| C    | -3.980289               | -2.053203 | -0.673756 |
| C    | 3.768561                | -2.420057 | -0.674218 |
| C    | 4.933444                | -1.965326 | -1.281367 |
| C    | 5.276911                | -0.597225 | -1.281173 |
| C    | 4.464900                | 0.353650  | -0.673833 |
| C    | -2.538649               | 3.689372  | -0.673991 |
| C    | -2.121232               | 4.867879  | -1.281663 |
| C    | -0.764735               | 5.254623  | -1.281811 |
| C    | 0.211533                | 4.473471  | -0.674275 |
| H    | -3.341397               | -5.220804 | -1.771638 |
| H    | -1.140376               | -4.789903 | -0.691242 |
| H    | -5.112944               | -3.504522 | -1.771118 |
| H    | -4.751583               | -1.291241 | -0.690241 |
| H    | -3.578341               | 3.381942  | -0.690626 |
| H    | -2.851514               | 5.503336  | -1.771739 |
| H    | -0.479453               | 6.179607  | -1.772024 |
| H    | 1.257025                | 4.760553  | -0.691114 |
| H    | 4.718661                | 1.407730  | -0.690392 |
| H    | 6.192584                | -0.282652 | -1.770945 |
| H    | 5.591993                | -2.674984 | -1.771254 |
| H    | 3.494373                | -3.469006 | -0.691019 |
| P    | 0.000438                | -0.000199 | 2.088434  |

**H<sub>2</sub>-TdCl**

| Atom | Coordinates (Angstroms) |           |           |
|------|-------------------------|-----------|-----------|
|      | X                       | Y         | Z         |
| N    | 0.193398                | 2.635186  | -0.392287 |
| C    | -1.002761               | 2.047539  | -0.629708 |
| C    | 1.310410                | 1.909521  | -0.583604 |
| N    | 1.263414                | 0.662977  | -1.137766 |
| N    | -1.131075               | 0.826348  | -1.218247 |
| C    | 2.281995                | -0.164594 | -0.760156 |
| N    | 2.173418                | -1.497541 | -0.686422 |
| C    | 0.991423                | -2.101708 | -0.881337 |
| N    | -0.124945               | -1.528161 | -1.474015 |
| C    | -2.268127               | 0.204701  | -0.819634 |
| N    | -2.396471               | -1.133747 | -0.736574 |
| C    | -1.322305               | -1.919116 | -0.898682 |
| C    | -2.305020               | 2.383931  | -0.033040 |
| C    | -3.110874               | 1.213803  | -0.156592 |
| C    | 2.655387                | 2.020198  | -0.023211 |
| C    | 3.264870                | 0.725787  | -0.141987 |
| C    | -0.977369               | -3.112999 | -0.148542 |
| C    | 0.451606                | -3.224889 | -0.137593 |
| C    | -2.784845               | 3.509144  | 0.633473  |
| C    | -4.083372               | 3.469480  | 1.145097  |
| C    | -4.876946               | 2.317481  | 1.022834  |
| C    | -4.393756               | 1.173397  | 0.384968  |
| C    | 3.331351                | 3.064005  | 0.611768  |
| C    | 4.611307                | 2.821691  | 1.103754  |
| C    | 5.208545                | 1.552592  | 0.987914  |
| C    | 4.540810                | 0.494732  | 0.376535  |
| C    | -1.762509               | -3.991095 | 0.609335  |
| C    | -1.125750               | -4.992446 | 1.329541  |
| C    | 0.281748                | -5.102330 | 1.340892  |
| C    | 1.078325                | -4.213127 | 0.632703  |
| H    | -4.486211               | 4.341331  | 1.652081  |
| H    | -2.162063               | 4.390645  | 0.746674  |
| H    | -5.880668               | 2.316446  | 1.437487  |
| H    | -4.996895               | 0.274353  | 0.309127  |
| H    | -2.842072               | -3.884577 | 0.621435  |
| H    | -1.717163               | -5.699216 | 1.903723  |
| H    | 0.746859                | -5.892075 | 1.923137  |
| H    | 2.160938                | -4.276881 | 0.662265  |
| H    | 4.993938                | -0.488366 | 0.300985  |
| H    | 6.206230                | 1.396935  | 1.387286  |
| H    | 5.158496                | 3.623366  | 1.590584  |
| H    | 2.863649                | 4.037650  | 0.715122  |
| H    | -0.100689               | -0.830846 | -2.196837 |
| H    | 0.246621                | 0.421614  | -1.324270 |

**H<sub>1</sub>-TdCl**

| Atom | Coordinates (Angstroms) |   |   |
|------|-------------------------|---|---|
|      | X                       | Y | Z |



|   |           |           |           |
|---|-----------|-----------|-----------|
| N | -1.325150 | -2.310038 | -0.560710 |
| C | 0.017120  | -2.296508 | -0.755182 |
| C | -1.991401 | -1.151682 | -0.716050 |
| N | -1.433310 | -0.000230 | -1.202291 |
| N | 0.668853  | -1.255704 | -1.314055 |
| C | -1.991665 | 1.151121  | -0.716106 |
| N | -1.325701 | 2.309654  | -0.560810 |
| C | 0.016579  | 2.296509  | -0.755258 |
| N | 0.668623  | 1.255921  | -1.314161 |
| C | 1.927974  | -1.159807 | -0.837051 |
| N | 2.609049  | 0.000327  | -0.699124 |
| C | 1.927730  | 1.160312  | -0.837077 |
| C | 1.011518  | -3.153018 | -0.081756 |
| C | 2.238887  | -2.423951 | -0.136041 |
| C | -3.241483 | -0.719091 | -0.098729 |
| C | -3.241652 | 0.718265  | -0.098774 |
| C | 2.238292  | 2.424523  | -0.136036 |
| C | 1.010731  | 3.153274  | -0.081793 |
| C | 0.943053  | -4.372349 | 0.590338  |
| C | 2.106085  | -4.882041 | 1.173493  |
| C | 3.313156  | -4.165309 | 1.120386  |
| C | 3.383281  | -2.923888 | 0.482812  |
| C | -4.285231 | -1.421657 | 0.511712  |
| C | -5.329403 | -0.705490 | 1.089761  |
| C | -5.329570 | 0.704241  | 1.089716  |
| C | -4.285569 | 1.420620  | 0.511622  |
| C | 3.382530  | 2.924741  | 0.482881  |
| C | 3.312056  | 4.166132  | 1.120474  |
| C | 2.104798  | 4.882554  | 1.173538  |
| C | 0.941923  | 4.372574  | 0.590322  |
| H | 2.076985  | -5.842761 | 1.682432  |
| H | 0.001515  | -4.910524 | 0.654978  |
| H | 4.201932  | -4.580707 | 1.589864  |
| H | 4.307035  | -2.352501 | 0.466139  |
| H | 4.306431  | 2.353590  | 0.466242  |
| H | 4.200704  | 4.581749  | 1.590001  |
| H | 2.075428  | 5.843255  | 1.682496  |
| H | 0.000242  | 4.910504  | 0.654936  |
| H | -4.270837 | 2.506435  | 0.529750  |
| H | -6.155208 | 1.237040  | 1.555202  |
| H | -6.154914 | -1.238457 | 1.555280  |
| H | -4.270242 | -2.507467 | 0.529904  |
| H | -0.434067 | -0.000117 | -1.522380 |

## 2-TdCl

| Atom | Coordinates (Angstroms) |          |           |
|------|-------------------------|----------|-----------|
|      | X                       | Y        | Z         |
| N    | -2.093273               | 1.601684 | -0.694428 |
| C    | -2.247621               | 0.263502 | -0.862807 |

|   |           |           |           |
|---|-----------|-----------|-----------|
| C | -0.842023 | 2.100599  | -0.862999 |
| N | 0.186439  | 1.431365  | -1.426509 |
| N | -1.332806 | -0.554268 | -1.426263 |
| C | 1.352044  | 1.814780  | -0.863021 |
| N | 2.433753  | 1.012003  | -0.694488 |
| C | 2.240165  | -0.321076 | -0.862860 |
| N | 1.146349  | -0.877185 | -1.426264 |
| C | -1.398163 | -1.779529 | -0.862696 |
| N | -0.340469 | -2.613680 | -0.694114 |
| C | 0.895609  | -2.078287 | -0.862668 |
| C | -3.211910 | -0.559468 | -0.102842 |
| C | -2.661708 | -1.882767 | -0.102764 |
| C | -0.299704 | 3.246411  | -0.102922 |
| C | 1.121415  | 3.061316  | -0.102997 |
| C | 2.090514  | -2.501762 | -0.102694 |
| C | 2.961418  | -1.363619 | -0.102879 |
| C | -4.396440 | -0.293346 | 0.584012  |
| C | -5.063424 | -1.343804 | 1.226250  |
| C | -4.523601 | -2.642172 | 1.226321  |
| C | -3.308437 | -2.910178 | 0.584167  |
| C | -0.866197 | 4.319948  | 0.584313  |
| C | -0.026598 | 5.238179  | 1.226755  |
| C | 1.367751  | 5.056627  | 1.226596  |
| C | 1.944081  | 3.954005  | 0.584056  |
| C | 2.452371  | -3.660506 | 0.584384  |
| C | 3.695658  | -3.712775 | 1.226503  |
| C | 4.550193  | -2.596108 | 1.226237  |
| C | 4.174624  | -1.409863 | 0.583918  |
| H | -6.006616 | -1.154360 | 1.738629  |
| H | -4.790182 | 0.720384  | 0.613913  |
| H | -5.054481 | -3.444418 | 1.738767  |
| H | -2.867409 | -3.904244 | 0.614186  |
| H | 1.771330  | -4.508356 | 0.614534  |
| H | 4.003240  | -4.624223 | 1.739034  |
| H | 5.510463  | -2.654648 | 1.738569  |
| H | 4.814971  | -0.530864 | 0.613718  |
| H | 3.018880  | 3.788202  | 0.613936  |
| H | 2.003350  | 5.778661  | 1.739153  |
| H | -0.455988 | 6.098870  | 1.739460  |
| H | -1.947609 | 4.434913  | 0.614382  |

### Si-Oc

| Atom | Coordinates (Angstroms) |           |           |
|------|-------------------------|-----------|-----------|
|      | X                       | Y         | Z         |
| N    | -1.907450               | -2.526495 | 0.652581  |
| C    | -1.733881               | -1.598495 | 1.603761  |
| C    | -1.738248               | -2.172161 | -0.628790 |
| N    | -1.168825               | -0.982810 | -1.026702 |

|   |           |           |           |
|---|-----------|-----------|-----------|
| N | -1.164098 | -0.365150 | 1.376876  |
| C | -1.704414 | -0.549086 | -2.219319 |
| N | -1.839751 | 0.742477  | -2.550593 |
| C | -1.666409 | 1.670809  | -1.599655 |
| N | -1.128653 | 1.406492  | -0.359443 |
| C | -1.695464 | 0.590274  | 2.214896  |
| N | -1.830795 | 1.881676  | 1.883069  |
| C | -1.661980 | 2.236443  | 0.601770  |
| C | -2.428668 | -1.503154 | 2.880312  |
| C | -2.404551 | -0.129708 | 3.263826  |
| C | -2.437985 | -2.703333 | -1.790535 |
| C | -2.416754 | -1.684822 | -2.788638 |
| C | -2.333223 | 3.314753  | -0.111019 |
| C | -2.336033 | 2.959822  | -1.492371 |
| C | -3.140450 | -2.440131 | 3.634014  |
| C | -3.787235 | -2.002364 | 4.785689  |
| C | -3.763426 | -0.645617 | 5.164532  |
| C | -3.092299 | 0.304022  | 4.400274  |
| C | -3.151643 | -3.886907 | -1.996534 |
| C | -3.803230 | -4.057890 | -3.214127 |
| C | -3.782285 | -3.051757 | -4.200084 |
| C | -3.109277 | -1.851935 | -3.990757 |
| C | -3.005938 | 4.456719  | 0.331675  |
| C | -3.640313 | 5.254410  | -0.615743 |
| C | -3.643092 | 4.903800  | -1.980249 |
| C | -3.011542 | 3.747569  | -2.428171 |
| H | -4.327223 | -2.715604 | 5.401232  |
| H | -3.177883 | -3.479567 | 3.325269  |
| H | -4.285497 | -0.337168 | 6.065362  |
| H | -3.093112 | 1.353666  | 4.674871  |
| H | -3.023431 | 4.709894  | 1.386547  |
| H | -4.149729 | 6.159814  | -0.299626 |
| H | -4.154599 | 5.545169  | -2.691722 |
| H | -3.033280 | 3.460860  | -3.474346 |
| H | -3.112283 | -1.064596 | -4.737243 |
| H | -4.308083 | -3.215208 | -5.136039 |
| H | -4.344795 | -4.979012 | -3.407595 |
| H | -3.186834 | -4.648768 | -1.224857 |
| N | 1.831720  | -1.882011 | -1.883208 |
| C | 1.695956  | -0.590529 | -2.214829 |
| C | 1.662705  | -2.236987 | -0.601912 |
| N | 1.128545  | -1.407674 | 0.359299  |
| N | 1.163949  | 0.364490  | -1.376987 |
| C | 1.666770  | -1.671470 | 1.599371  |
| N | 1.839954  | -0.743090 | 2.550387  |
| C | 1.704199  | 0.548426  | 2.219020  |
| N | 1.168507  | 0.981873  | 1.026423  |
| C | 1.732799  | 1.598199  | -1.603833 |
| N | 1.905832  | 2.526403  | -0.652621 |
| C | 1.736874  | 2.171783  | 0.628766  |
| C | 2.404962  | 0.129842  | -3.263595 |
| C | 2.428032  | 1.503323  | -2.880173 |
| C | 2.334708  | -3.314907 | 0.110799  |
| C | 2.337265  | -2.960000 | 1.492149  |
| C | 2.436282  | 2.703263  | 1.790568  |

|    |           |           |           |
|----|-----------|-----------|-----------|
| C  | 2.415816  | 1.684542  | 2.788476  |
| C  | 3.093390  | -0.303509 | -4.399795 |
| C  | 3.764113  | 0.646532  | -5.163867 |
| C  | 3.786879  | 2.003354  | -4.785096 |
| C  | 3.139437  | 2.440753  | -3.633692 |
| C  | 3.008327  | -4.456349 | -0.331920 |
| C  | 3.643274  | -5.253554 | 0.615496  |
| C  | 3.645807  | -4.902941 | 1.980033  |
| C  | 3.013427  | -3.747207 | 2.427960  |
| C  | 3.149111  | 3.887326  | 1.996815  |
| C  | 3.800604  | 4.058514  | 3.214404  |
| C  | 3.780424  | 3.052146  | 4.200176  |
| C  | 3.108282  | 1.851905  | 3.990626  |
| H  | 4.286713  | 0.338444  | -6.064512 |
| H  | 3.094993  | -1.353180 | -4.674283 |
| H  | 4.326612  | 2.716875  | -5.400535 |
| H  | 3.176064  | 3.480218  | -3.324935 |
| H  | 3.183730  | 4.649355  | 1.225277  |
| H  | 4.341526  | 4.979969  | 3.408096  |
| H  | 4.306165  | 3.215835  | 5.136122  |
| H  | 3.111856  | 1.064389  | 4.736924  |
| H  | 3.034990  | -3.460412 | 3.474116  |
| H  | 4.157840  | -5.543964 | 2.691442  |
| H  | 4.153392  | -6.158588 | 0.299453  |
| H  | 3.026031  | -4.709445 | -1.386806 |
| Si | -0.000166 | -0.000324 | -0.000003 |

### Ge-Oc

| Atom | Coordinates (Angstroms) |           |           |
|------|-------------------------|-----------|-----------|
|      | X                       | Y         | Z         |
| N    | 1.947221                | 2.612911  | -0.343607 |
| C    | 1.786074                | 2.115907  | 0.892381  |
| C    | 1.786353                | 1.813111  | -1.409000 |
| N    | 1.214641                | 0.564221  | -1.364078 |
| N    | 1.214408                | 0.897847  | 1.171872  |
| C    | 1.783735                | -0.288122 | -2.279760 |
| N    | 1.942371                | -1.607329 | -2.092332 |
| C    | 1.781493                | -2.129785 | -0.866799 |
| N    | 1.212900                | -1.464573 | 0.192746  |
| C    | 1.783339                | 0.311386  | 2.276987  |

---

|   |           |           |           |
|---|-----------|-----------|-----------|
| N | 1.942032  | -1.011399 | 2.437124  |
| C | 1.781341  | -1.833037 | 1.388405  |
| C | 2.531757  | 2.496139  | 2.085783  |
| C | 2.529979  | 1.364306  | 2.954304  |
| C | 2.532289  | 1.871723  | -2.660004 |
| C | 2.530560  | 0.553776  | -3.206248 |
| C | 2.525028  | -3.058106 | 1.122040  |
| C | 2.525158  | -3.244231 | -0.292490 |
| C | 3.267873  | 3.638693  | 2.408736  |
| C | 3.961319  | 3.655939  | 3.614964  |
| C | 3.959550  | 2.538505  | 4.472460  |
| C | 3.264325  | 1.379183  | 4.142631  |
| C | 3.268631  | 2.891831  | -3.267265 |
| C | 3.962370  | 2.596484  | -4.436728 |
| C | 3.960655  | 1.295296  | -4.976049 |
| C | 3.265198  | 0.260763  | -4.357788 |
| C | 3.258139  | -3.910620 | 1.951117  |
| C | 3.950470  | -4.965160 | 1.363952  |
| C | 3.950613  | -5.148912 | -0.032544 |
| C | 3.258423  | -4.282180 | -0.872661 |
| H | 4.521047  | 4.542123  | 3.898770  |
| H | 3.288548  | 4.487523  | 1.733340  |
| H | 4.517942  | 2.582239  | 5.402757  |
| H | 3.282322  | 0.507116  | 4.787824  |
| H | 3.277402  | -3.750287 | 3.023975  |
| H | 4.507859  | -5.655175 | 1.990340  |
| H | 4.508109  | -5.977462 | -0.459003 |
| H | 3.277919  | -4.404850 | -1.950471 |
| H | 3.283261  | -0.748508 | -4.755464 |
| H | 4.519302  | 1.096892  | -5.885837 |
| H | 4.522301  | 3.379075  | -4.939913 |
| H | 3.289292  | 3.886445  | -2.834348 |
| N | -1.942511 | 1.011510  | -2.437201 |
| C | -1.783812 | -0.311306 | -2.276966 |
| C | -1.781813 | 1.833103  | -1.388408 |
| N | -1.213740 | 1.464323  | -0.192740 |
| N | -1.215083 | -0.897609 | -1.171763 |
| C | -1.781895 | 2.129787  | 0.866817  |
| N | -1.942751 | 1.607342  | 2.092391  |
| C | -1.784116 | 0.288085  | 2.279704  |
| N | -1.215254 | -0.564123 | 1.363838  |
| C | -1.786121 | -2.115969 | -0.892468 |
| N | -1.947117 | -2.613088 | 0.343551  |
| C | -1.786422 | -1.813224 | 1.408963  |
| C | -2.530149 | -1.364391 | -2.954387 |
| C | -2.531647 | -2.496318 | -2.085952 |
| C | -2.525085 | 3.058450  | -1.122021 |
| C | -2.525162 | 3.244538  | 0.292533  |
| C | -2.532173 | -1.871944 | 2.660087  |
| C | -2.530645 | -0.553967 | 3.206299  |
| C | -3.264389 | -1.379381 | -4.142772 |
| C | -3.959241 | -2.538877 | -4.472763 |
| C | -3.960740 | -3.656390 | -3.615368 |
| C | -3.267391 | -3.639055 | -2.409087 |
| C | -3.257844 | 3.911285  | -1.951064 |

|    |           |           |           |
|----|-----------|-----------|-----------|
| C  | -3.949750 | 4.966108  | -1.363882 |
| C  | -3.949835 | 5.149821  | 0.032608  |
| C  | -3.258013 | 4.282767  | 0.872707  |
| C  | -3.268190 | -2.892179 | 3.267533  |
| C  | -3.961785 | -2.596937 | 4.437105  |
| C  | -3.960255 | -1.295728 | 4.976387  |
| C  | -3.265133 | -0.261077 | 4.357966  |
| H  | -4.517549 | -2.582702 | -5.403105 |
| H  | -3.282578 | -0.507257 | -4.787883 |
| H  | -4.520184 | -4.542709 | -3.899309 |
| H  | -3.287858 | -4.487960 | -1.733778 |
| H  | -3.288705 | -3.886816 | 2.834663  |
| H  | -4.521461 | -3.379623 | 4.940423  |
| H  | -4.518785 | -1.097426 | 5.886269  |
| H  | -3.283318 | 0.748210  | 4.755601  |
| H  | -3.277474 | 4.405413  | 1.950522  |
| H  | -4.506994 | 5.978590  | 0.459083  |
| H  | -4.506839 | 5.656372  | -1.990261 |
| H  | -3.277161 | 3.750998  | -3.023929 |
| Ge | -0.000144 | -0.000031 | 0.000036  |

### Sn-Oc

| Atom | Coordinates (Angstroms) |           |           |
|------|-------------------------|-----------|-----------|
|      | X                       | Y         | Z         |
| N    | -2.179148               | 1.156923  | 2.360083  |
| C    | -2.015436               | 1.924581  | 1.270938  |
| C    | -2.015477               | -0.174220 | 2.299764  |
| N    | -1.409120               | -0.846020 | 1.259586  |
| N    | -1.409075               | 1.513909  | 0.102769  |
| C    | -2.015285               | -2.063120 | 1.031198  |
| N    | -2.178837               | -2.622562 | -0.178191 |
| C    | -2.015290               | -1.904648 | -1.300783 |
| N    | -1.409231               | -0.667774 | -1.362378 |
| C    | -2.015284               | 2.078963  | -0.999129 |
| N    | -2.179070               | 1.465620  | -2.182053 |
| C    | -2.015538               | 0.138519  | -2.302177 |
| C    | -2.805017               | 3.103239  | 0.925748  |
| C    | -2.804970               | 3.200016  | -0.497663 |
| C    | -2.805035               | -1.169089 | 3.019970  |
| C    | -2.804992               | -2.353434 | 2.224471  |

---

|   |           |           |           |
|---|-----------|-----------|-----------|
| C | -2.805060 | -0.749826 | -3.150319 |
| C | -2.804959 | -2.030923 | -2.522383 |
| C | -3.584489 | 3.969483  | 1.697541  |
| C | -4.319963 | 4.953131  | 1.042645  |
| C | -4.319964 | 5.048681  | -0.363224 |
| C | -3.584461 | 4.162700  | -1.145174 |
| C | -3.584403 | -1.089790 | 4.177538  |
| C | -4.319698 | -2.210085 | 4.553912  |
| C | -4.319692 | -3.379797 | 3.768183  |
| C | -3.584345 | -3.455012 | 2.588780  |
| C | -3.584318 | -0.514709 | -4.286590 |
| C | -4.319430 | -1.573852 | -4.811191 |
| C | -4.319365 | -2.839134 | -4.190967 |
| C | -3.584158 | -3.073168 | -3.032489 |
| H | -4.912378 | 5.655072  | 1.622241  |
| H | -3.605057 | 3.874042  | 2.778273  |
| H | -4.912362 | 5.822597  | -0.842523 |
| H | -3.604933 | 4.214409  | -2.228884 |
| H | -3.604833 | 0.468906  | -4.744405 |
| H | -4.911577 | -1.423035 | -5.709092 |
| H | -4.911413 | -3.641329 | -4.621748 |
| H | -3.604461 | -4.037586 | -2.535493 |
| H | -3.604783 | -4.343259 | 1.965793  |
| H | -4.911938 | -4.232804 | 4.086356  |
| H | -4.911967 | -2.182065 | 5.463880  |
| H | -3.604898 | -0.177156 | 4.764222  |
| N | 2.179022  | -1.465625 | 2.182039  |
| C | 2.015252  | -2.078962 | 0.999107  |
| C | 2.015497  | -0.138523 | 2.302161  |
| N | 1.409215  | 0.667776  | 1.362356  |
| N | 1.409069  | -1.513901 | -0.102798 |
| C | 2.015281  | 1.904646  | 1.300780  |
| N | 2.178852  | 2.622565  | 0.178196  |
| C | 2.015318  | 2.063129  | -1.031200 |
| N | 1.409149  | 0.846033  | -1.259604 |
| C | 2.015449  | -1.924575 | -1.270959 |
| N | 2.179185  | -1.156912 | -2.360095 |
| C | 2.015522  | 0.174231  | -2.299778 |
| C | 2.804941  | -3.200019 | 0.497654  |
| C | 2.805016  | -3.103239 | -0.925757 |
| C | 2.805006  | 0.749814  | 3.150329  |
| C | 2.804926  | 2.030913  | 2.522399  |
| C | 2.805099  | 1.169098  | -3.01996  |
| C | 2.805049  | 2.353441  | -2.224454 |
| C | 3.584411  | -4.162711 | 1.145178  |
| C | 4.319921  | -5.048697 | 0.36324   |
| C | 4.319948  | -4.953144 | -1.042628 |
| C | 3.584495  | -3.969488 | -1.697536 |
| C | 3.584234  | 0.514687  | 4.286616  |
| C | 4.31934   | 1.573823  | 4.81124   |
| C | 4.319296  | 2.839107  | 4.191023  |
| C | 3.584118  | 3.073151  | 3.032528  |
| C | 3.584491  | 1.0898    | -4.177513 |
| C | 4.319802  | 2.210091  | -4.553867 |
| C | 4.319788  | 3.3798    | -3.768132 |

|    |          |           |           |
|----|----------|-----------|-----------|
| C  | 3.584419 | 3.455014  | -2.588744 |
| H  | 4.912303 | -5.822619 | 0.842549  |
| H  | 3.604861 | -4.214422 | 2.228888  |
| H  | 4.912369 | -5.655089 | -1.622215 |
| H  | 3.605085 | -3.874046 | -2.778268 |
| H  | 3.604991 | 0.17717   | -4.764203 |
| H  | 4.912089 | 2.182071  | -5.463823 |
| H  | 4.912047 | 4.232804  | -4.086288 |
| H  | 3.604851 | 4.343258  | -1.965752 |
| H  | 3.604438 | 4.037571  | 2.535537  |
| H  | 4.911339 | 3.641297  | 4.621821  |
| H  | 4.911466 | 1.422998  | 5.709154  |
| H  | 3.604734 | -0.468932 | 4.744426  |
| Sn | 0        | 0.000011  | -0.000035 |

### Pb-Oc

| Atom | Coordinates (Angstroms) |           |           |
|------|-------------------------|-----------|-----------|
|      | X                       | Y         | Z         |
| N    | 2.259899                | 0.300904  | 2.610510  |
| C    | 2.096306                | -0.933974 | 2.110026  |
| C    | 2.098998                | 1.390609  | 1.842925  |
| N    | 1.490307                | 1.402818  | 0.606830  |
| N    | 1.488731                | -1.224673 | 0.907902  |
| C    | 2.101361                | 2.295903  | -0.247179 |
| N    | 2.264685                | 2.110050  | -1.566733 |
| C    | 2.101077                | 0.901024  | -2.126860 |
| N    | 1.489637                | -0.174632 | -1.519656 |
| C    | 2.095646                | -2.291397 | 0.281058  |
| N    | 2.258664                | -2.412479 | -1.046048 |
| C    | 2.097663                | -1.361959 | -1.866335 |
| C    | 2.894768                | -2.109175 | 2.452095  |
| C    | 2.894351                | -2.959458 | 1.306278  |
| C    | 2.903134                | 2.608915  | 1.907862  |
| C    | 2.904602                | 3.176020  | 0.598494  |
| C    | 2.900632                | -1.071184 | -3.052085 |
| C    | 2.902871                | 0.346352  | -3.215192 |
| C    | 3.681594                | -2.416675 | 3.565473  |
| C    | 4.423382                | -3.594430 | 3.542606  |
| C    | 4.422964                | -4.434022 | 2.411231  |
| C    | 3.680775                | -4.114460 | 1.277706  |



---

|   |           |           |           |
|---|-----------|-----------|-----------|
| C | 3.693572  | 3.157837  | 2.921396  |
| C | 4.440884  | 4.295636  | 2.630466  |
| C | 4.442381  | 4.855608  | 1.337605  |
| C | 3.696590  | 4.290185  | 0.307171  |
| C | 3.689919  | -1.882473 | -3.872025 |
| C | 4.436651  | -1.274555 | -4.877281 |
| C | 4.438774  | 0.125132  | -5.038385 |
| C | 3.694228  | 0.947769  | -4.197785 |
| H | 5.020950  | -3.868773 | 4.407052  |
| H | 3.702582  | -1.752257 | 4.423171  |
| H | 5.020249  | -5.341068 | 2.423069  |
| H | 3.701208  | -4.742868 | 0.393273  |
| H | 3.708974  | -2.957517 | -3.725556 |
| H | 5.036236  | -1.886635 | -5.544719 |
| H | 5.039975  | 0.567791  | -5.827199 |
| H | 3.716583  | 2.027913  | -4.299385 |
| H | 3.718387  | 4.700618  | -0.697122 |
| H | 5.044012  | 5.738490  | 1.142218  |
| H | 5.041398  | 4.756521  | 3.409300  |
| H | 3.713108  | 2.705943  | 3.907776  |
| N | -2.259195 | 2.407504  | 1.057662  |
| C | -2.098780 | 2.294722  | -0.270438 |
| C | -2.095256 | 1.352566  | 1.871808  |
| N | -1.487179 | 0.167853  | 1.516728  |
| N | -1.489483 | 1.234088  | -0.905706 |
| C | -2.094731 | -0.911441 | 2.120829  |
| N | -2.258172 | -2.118416 | 1.555766  |
| C | -2.097479 | -2.296205 | 0.234800  |
| N | -1.490473 | -1.397088 | -0.614776 |
| C | -2.101722 | 0.946840  | -2.106554 |
| N | -2.265048 | -0.286345 | -2.612069 |
| C | -2.101085 | -1.379584 | -1.849937 |
| C | -2.903667 | 2.965167  | -1.289053 |
| C | -2.905529 | 2.120807  | -2.439293 |
| C | -2.894674 | 1.054964  | 3.058145  |
| C | -2.894103 | -0.363345 | 3.214315  |
| C | -2.902184 | -2.59963  | -1.920474 |
| C | -2.899892 | -3.174    | -0.614333 |
| C | -3.694649 | 4.116858  | -1.251135 |
| C | -4.442729 | 4.439328  | -2.379856 |
| C | -4.444529 | 3.605593  | -3.51568  |
| C | -3.698286 | 2.430987  | -3.547822 |
| C | -3.682655 | 1.860981  | 3.884509  |
| C | -4.425332 | 1.246898  | 4.889015  |
| C | -4.424707 | -0.153576 | 5.043241  |
| C | -3.681425 | -0.970892 | 4.196355  |
| C | -3.692783 | -3.145022 | -2.935753 |
| C | -4.43653  | -4.286465 | -2.649862 |
| C | -4.434309 | -4.853605 | -1.360149 |
| C | -3.688286 | -4.291888 | -0.327804 |
| H | -5.043691 | 5.344004  | -2.384535 |
| H | -3.713984 | 4.740445  | -0.363276 |
| H | -5.046829 | 3.882115  | -4.376138 |
| H | -3.720325 | 1.770835  | -4.408777 |
| H | -3.71528  | -2.687643 | -3.91954  |

|    |           |           |           |
|----|-----------|-----------|-----------|
| H  | -5.037163 | -4.74465  | -3.430198 |
| H  | -5.03324  | -5.739178 | -1.168679 |
| H  | -3.707346 | -4.707861 | 0.674266  |
| H  | -3.701804 | -2.051566 | 4.29262   |
| H  | -5.02278  | -0.601037 | 5.831724  |
| H  | -5.023831 | 1.854686  | 5.561329  |
| H  | -3.703839 | 2.936703  | 3.743396  |
| Pb | 0.000037  | 0.002978  | -0.003924 |

**Ti-Oc**

| Atom | Coordinates (Angstroms) |           |           |
|------|-------------------------|-----------|-----------|
|      | X                       | Y         | Z         |
| N    | 2.101667                | -2.604266 | -0.281184 |
| C    | 1.927258                | -1.833977 | -1.365778 |
| C    | 1.944199                | -2.087758 | 0.946824  |
| N    | 1.373693                | -0.858057 | 1.200942  |
| N    | 1.354050                | -0.580691 | -1.338524 |
| C    | 1.969016                | -0.257910 | 2.290150  |
| N    | 2.149271                | 1.066130  | 2.411058  |
| C    | 1.974602                | 1.869095  | 1.350424  |
| N    | 1.386119                | 1.470634  | 0.168079  |
| C    | 1.934248                | 0.242525  | -2.280422 |
| N    | 2.114497                | 1.561844  | -2.117703 |
| C    | 1.957188                | 2.117481  | -0.906649 |
| C    | 2.652681                | -1.932441 | -2.627680 |
| C    | 2.656333                | -0.626410 | -3.203339 |
| C    | 2.685890                | -2.456275 | 2.147607  |
| C    | 2.701676                | -1.305393 | 2.992261  |
| C    | 2.696439                | 3.251469  | -0.363693 |
| C    | 2.706560                | 3.095671  | 1.055477  |
| C    | 3.370019                | -2.974016 | -3.222562 |
| C    | 4.049313                | -2.711102 | -4.408091 |
| C    | 4.052846                | -1.421651 | -4.976487 |
| C    | 3.377159                | -0.366097 | -4.372133 |
| C    | 3.408199                | -3.601966 | 2.493090  |
| C    | 4.105008                | -3.601556 | 3.697309  |
| C    | 4.120575                | -2.465464 | 4.531093  |
| C    | 3.439701                | -1.304302 | 4.179336  |
| C    | 3.419518                | 4.281904  | -0.971193 |
| C    | 4.111602                | 5.169924  | -0.153763 |

---

|   |           |           |           |
|---|-----------|-----------|-----------|
| C | 4.121531  | 5.016157  | 1.247068  |
| C | 3.439563  | 3.970910  | 1.861948  |
| H | 4.593464  | -3.510082 | -4.902839 |
| H | 3.386916  | -3.959126 | -2.768224 |
| H | 4.599655  | -1.250341 | -5.898925 |
| H | 3.399566  | 0.633812  | -4.792645 |
| H | 3.431007  | 4.382166  | -2.051454 |
| H | 4.660823  | 5.993295  | -0.600587 |
| H | 4.678186  | 5.723831  | 1.854161  |
| H | 3.466360  | 3.834357  | 2.937950  |
| H | 3.470858  | -0.419226 | 4.806090  |
| H | 4.680874  | -2.497786 | 5.460745  |
| H | 4.653637  | -4.488581 | 3.999680  |
| H | 3.415512  | -4.465558 | 1.836363  |
| N | -2.124769 | -1.598691 | 2.089697  |
| C | -1.968675 | -0.280528 | 2.284530  |
| C | -1.939144 | -2.125342 | 0.869955  |
| N | -1.357044 | -1.450834 | -0.182502 |
| N | -1.391426 | 0.571318  | 1.366756  |
| C | -1.922102 | -1.831668 | -1.380023 |
| N | -2.091320 | -1.006984 | -2.424432 |
| C | -1.935752 | 0.316168  | -2.268177 |
| N | -1.374249 | 0.902307  | -1.153518 |
| C | -1.982687 | 1.816452  | 1.414708  |
| N | -2.152598 | 2.608811  | 0.345738  |
| C | -1.967303 | 2.117931  | -0.889006 |
| C | -2.714804 | 0.557134  | 3.216610  |
| C | -2.722882 | 1.875942  | 2.670019  |
| C | -2.655551 | -3.257299 | 0.292173  |
| C | -2.645648 | -3.072157 | -1.123142 |
| C | -2.691538 | 2.499660  | -2.096332 |
| C | -2.671484 | 1.366506  | -2.963914 |
| C | -3.445493 | 0.261155  | 4.370834  |
| C | -4.143144 | 1.293452  | 4.990012  |
| C | -4.151061 | 2.595341  | 4.450451  |
| C | -3.461477 | 2.894118  | 3.279595  |
| C | -3.376082 | -4.307839 | 0.867133  |
| C | -4.045427 | -5.186506 | 0.020950  |
| C | -4.035728 | -5.003688 | -1.376220 |
| C | -3.356483 | -3.938087 | -1.958698 |
| C | -3.424817 | 3.640793  | -2.433303 |
| C | -4.096874 | 3.654228  | -3.651590 |
| C | -4.077107 | 2.535471  | -4.508146 |
| C | -3.384823 | 1.378063  | -4.165714 |
| H | -4.698391 | 1.094007  | 5.901696  |
| H | -3.458559 | -0.747972 | 4.769124  |
| H | -4.712281 | 3.375450  | 4.956125  |
| H | -3.486754 | 3.888883  | 2.847217  |
| H | -3.459412 | 4.490573  | -1.759628 |
| H | -4.653367 | 4.538625  | -3.947249 |
| H | -4.618718 | 2.577953  | -5.448416 |
| H | -3.388982 | 0.505555  | -4.810588 |
| H | -3.368699 | -3.779326 | -3.031919 |
| H | -4.574913 | -5.704642 | -2.006458 |
| H | -4.591916 | -6.025027 | 0.442238  |

|    |           |           |          |
|----|-----------|-----------|----------|
| H  | -3.403264 | -4.430387 | 1.944815 |
| Ti | 0.001497  | 0.020918  | 0.025039 |

**V-Oc**

| Atom | Coordinates (Angstroms) |           |           |
|------|-------------------------|-----------|-----------|
|      | X                       | Y         | Z         |
| N    | 2.053043                | -2.300538 | 1.272393  |
| C    | 1.891475                | -2.286792 | -0.058418 |
| C    | 1.877103                | -1.173645 | 1.977580  |
| N    | 1.303544                | -0.029118 | 1.466632  |
| N    | 1.325518                | -1.243229 | -0.757975 |
| C    | 1.876888                | 1.093882  | 2.023557  |
| N    | 2.052711                | 2.248342  | 1.364394  |
| C    | 1.891221                | 2.288208  | 0.034112  |
| N    | 1.325800                | 1.273408  | -0.706938 |
| C    | 1.892221                | -1.119623 | -2.006170 |
| N    | 2.064605                | 0.053614  | -2.632873 |
| C    | 1.892163                | 1.200521  | -1.959182 |
| C    | 2.605071                | -3.100250 | -1.036910 |
| C    | 2.610008                | -2.365136 | -2.260100 |
| C    | 2.592466                | -0.778184 | 3.183394  |
| C    | 2.592427                | 0.650008  | 3.212321  |
| C    | 2.609389                | 2.455607  | -2.162745 |
| C    | 2.604338                | 3.140776  | -0.910903 |
| C    | 3.308865                | -4.302423 | -0.926098 |
| C    | 3.980519                | -4.776930 | -2.048828 |
| C    | 3.986539                | -4.050504 | -3.255694 |
| C    | 3.321204                | -2.832952 | -3.367753 |
| C    | 3.302066                | -1.509056 | 4.141194  |
| C    | 3.971033                | -0.808590 | 5.139134  |
| C    | 3.971047                | 0.601215  | 5.167663  |
| C    | 3.302076                | 1.341507  | 4.198898  |
| C    | 3.320269                | 2.967951  | -3.250696 |
| C    | 3.985198                | 4.180258  | -3.089733 |
| C    | 3.979103                | 4.857382  | -1.854555 |
| C    | 3.307766                | 4.337713  | -0.751781 |
| H    | 4.516271                | -5.719918 | -1.994496 |
| H    | 3.323170                | -4.846287 | 0.012615  |
| H    | 4.526146                | -4.446922 | -4.110647 |
| H    | 3.344473                | -2.259517 | -4.288520 |

---

|   |           |           |           |
|---|-----------|-----------|-----------|
| H | 3.343659  | 2.432087  | -4.193821 |
| H | 4.524577  | 4.610985  | -3.928070 |
| H | 4.514542  | 5.797591  | -1.762255 |
| H | 3.322095  | 4.843246  | 0.208119  |
| H | 3.320712  | 2.426289  | 4.203729  |
| H | 4.510365  | 1.115034  | 5.957823  |
| H | 4.510353  | -1.353979 | 5.907841  |
| H | 3.320736  | -2.593144 | 4.102083  |
| N | -2.064513 | -0.054362 | 2.632837  |
| C | -1.892470 | 1.119144  | 2.006551  |
| C | -1.891800 | -1.200983 | 1.958739  |
| N | -1.325472 | -1.273323 | 0.706446  |
| N | -1.325879 | 1.243284  | 0.758356  |
| C | -1.890625 | -2.288032 | -0.034865 |
| N | -2.052144 | -2.247778 | -1.365135 |
| C | -1.876669 | -1.093062 | -2.023923 |
| N | -1.303647 | 0.029956  | -1.466659 |
| C | -1.892155 | 2.286945  | 0.059117  |
| N | -2.053794 | 2.301066  | -1.271668 |
| C | -1.877558 | 1.174471  | -1.977254 |
| C | -2.610519 | 2.364409  | 2.260904  |
| C | -2.605823 | 3.099920  | 1.037941  |
| C | -2.608701 | -2.456327 | 2.161941  |
| C | -2.603531 | -3.141089 | 0.909886  |
| C | -2.592812 | 0.779168  | -3.183172 |
| C | -2.592331 | -0.649017 | -3.212547 |
| C | -3.321736 | 2.831731  | 3.368755  |
| C | -3.987336 | 4.049175  | 3.257128  |
| C | -3.981554 | 4.775990  | 2.050492  |
| C | -3.309874 | 4.301987  | 0.927569  |
| C | -3.319400 | -2.969193 | 3.249758  |
| C | -3.984026 | -4.181627 | 3.088440  |
| C | -3.977814 | -4.858348 | 1.853051  |
| C | -3.306661 | -4.338145 | 0.750406  |
| C | -3.302645 | 1.510122  | -4.140742 |
| C | -3.971394 | 0.809765  | -5.138901 |
| C | -3.970967 | -0.600032 | -5.167877 |
| C | -3.301763 | -1.340421 | -4.199347 |
| H | -4.526968 | 4.445204  | 4.112246  |
| H | -3.344814 | 2.258005  | 4.289345  |
| H | -4.517508 | 5.718882  | 1.996497  |
| H | -3.324352 | 4.846154  | -0.010966 |
| H | -3.321647 | 2.594192  | -4.101292 |
| H | -4.510885 | 1.355230  | -5.907434 |
| H | -4.510124 | -1.113770 | -5.958199 |
| H | -3.320058 | -2.425207 | -4.204523 |
| H | -3.320910 | -4.843374 | -0.209655 |
| H | -4.513011 | -5.798666 | 1.760467  |
| H | -4.523250 | -4.612758 | 3.926669  |
| H | -3.342888 | -2.433636 | 4.193054  |
| V | -0.000036 | 0.000437  | -0.000057 |

**Mn-Oc**

| Atom | Coordinates (Angstroms) |           |           |
|------|-------------------------|-----------|-----------|
|      | X                       | Y         | Z         |
| N    | 1.973781                | -2.628267 | 0.149242  |
| C    | 1.809624                | -2.034745 | -1.040855 |
| C    | 1.809079                | -1.904228 | 1.264638  |
| N    | 1.253452                | -0.646970 | 1.292732  |
| N    | 1.253953                | -0.788802 | -1.210878 |
| C    | 1.800947                | 0.126401  | 2.288917  |
| N    | 1.957674                | 1.454832  | 2.208750  |
| C    | 1.793842                | 2.057722  | 1.023350  |
| N    | 1.246950                | 1.449250  | -0.081371 |
| C    | 1.802235                | -0.132460 | -2.287363 |
| N    | 1.958953                | 1.196487  | -2.357239 |
| C    | 1.794383                | 1.929224  | -1.247493 |
| C    | 2.510531                | -2.339459 | -2.283082 |
| C    | 2.505891                | -1.145954 | -3.065129 |
| C    | 2.509165                | -2.066980 | 2.533703  |
| C    | 2.504089                | -0.792966 | 3.176314  |
| C    | 2.487687                | 3.162423  | -0.892661 |
| C    | 2.487457                | 3.242980  | 0.532010  |
| C    | 3.208496                | -3.470333 | -2.714546 |
| C    | 3.862795                | -3.409976 | -3.941406 |
| C    | 3.858263                | -2.231669 | -4.713469 |
| C    | 3.199294                | -1.086287 | -4.276687 |
| C    | 3.206953                | -3.141979 | 3.090246  |
| C    | 3.860646                | -2.943643 | 4.302770  |
| C    | 3.855647                | -1.685840 | 4.937184  |
| C    | 3.196815                | -0.597071 | 4.373826  |
| C    | 3.176142                | 4.106541  | -1.658689 |
| C    | 3.825229                | 5.143643  | -0.995271 |
| C    | 3.824953                | 5.223182  | 0.411171  |
| C    | 3.175626                | 4.267434  | 1.187022  |
| H    | 4.393127                | -4.283233 | -4.309337 |
| H    | 3.230738                | -4.368199 | -2.105904 |
| H    | 4.385188                | -2.217516 | -5.662863 |
| H    | 3.214574                | -0.169649 | -4.856895 |
| H    | 3.195261                | 4.028481  | -2.740651 |
| H    | 4.348077                | 5.902694  | -1.569442 |
| H    | 4.347538                | 6.042171  | 0.896312  |
| H    | 3.194275                | 4.311843  | 2.270894  |
| H    | 3.211637                | 0.379102  | 4.847076  |
| H    | 4.382081                | -1.564806 | 5.879213  |
| H    | 4.390855                | -3.769789 | 4.767060  |

---

|    |           |           |           |
|----|-----------|-----------|-----------|
| H  | 3.229556  | -4.102692 | 2.586640  |
| N  | -1.958359 | -1.197145 | 2.357329  |
| C  | -1.802162 | 0.132124  | 2.287083  |
| C  | -1.792817 | -1.929362 | 1.247045  |
| N  | -1.245378 | -1.448846 | 0.081450  |
| N  | -1.253804 | 0.788577  | 1.211209  |
| C  | -1.791702 | -2.057148 | -1.023383 |
| N  | -1.956098 | -1.454268 | -2.209035 |
| C  | -1.800068 | -0.125470 | -2.288361 |
| N  | -1.252648 | 0.647757  | -1.292512 |
| C  | -1.809037 | 2.034399  | 1.041438  |
| N  | -1.973145 | 2.628896  | -0.148520 |
| C  | -1.808233 | 1.904723  | -1.264090 |
| C  | -2.507135 | 1.144966  | 3.064669  |
| C  | -2.511417 | 2.338722  | 2.283031  |
| C  | -2.486306 | -3.162382 | 0.891891  |
| C  | -2.485701 | -3.242494 | -0.532807 |
| C  | -2.509546 | 2.067534  | -2.532602 |
| C  | -2.504485 | 0.793549  | -3.175273 |
| C  | -3.201825 | 1.084545  | 4.275462  |
| C  | -3.861611 | 2.22954   | 4.711943  |
| C  | -3.865796 | 3.408145  | 3.940251  |
| C  | -3.210318 | 3.469185  | 2.71409   |
| C  | -3.175339 | -4.10648  | 1.657507  |
| C  | -3.824427 | -5.143169 | 0.993565  |
| C  | -3.823816 | -5.222263 | -0.41297  |
| C  | -3.174123 | -4.266485 | -1.188376 |
| C  | -3.208243 | 3.142276  | -3.088488 |
| C  | -3.862816 | 2.943713  | -4.300491 |
| C  | -3.857865 | 1.685915  | -4.934951 |
| C  | -3.19819  | 0.597368  | -4.372162 |
| H  | -4.389543 | 2.214958  | 5.660774  |
| H  | -3.2175   | 0.167637  | 4.855238  |
| H  | -4.396868 | 4.281022  | 4.308028  |
| H  | -3.232373 | 4.367155  | 2.105588  |
| H  | -3.230915 | 4.102923  | -2.584752 |
| H  | -4.393729 | 3.769638  | -4.76438  |
| H  | -4.385057 | 1.564764  | -5.876544 |
| H  | -3.21317  | -0.378841 | -4.845342 |
| H  | -3.192593 | -4.310412 | -2.272267 |
| H  | -4.346548 | -6.041028 | -0.898343 |
| H  | -4.347668 | -5.902358 | 1.567207  |
| H  | -3.194807 | -4.028622 | 2.739473  |
| Mn | 0.000947  | 0.000392  | 0.00016   |

## Tc-Oc

| Atom | Coordinates (Angstroms) |           |           |
|------|-------------------------|-----------|-----------|
|      | X                       | Y         | Z         |
| N    | 2.158722                | -2.631811 | 0.044167  |
| C    | 1.994780                | -2.001541 | -1.128552 |
| C    | 1.994821                | -1.962536 | 1.195077  |
| N    | 1.413335                | -0.718377 | 1.294507  |
| N    | 1.413310                | -0.761411 | -1.269629 |
| C    | 1.994500                | 0.024114  | 2.298009  |
| N    | 2.157934                | 1.354910  | 2.257511  |
| C    | 1.994012                | 2.016895  | 1.102390  |
| N    | 1.413145                | 1.480482  | -0.024897 |
| C    | 1.994297                | -0.053042 | -2.297608 |
| N    | 2.157657                | 1.278379  | -2.301879 |
| C    | 1.993822                | 1.978782  | -1.169628 |
| C    | 2.734343                | -2.248706 | -2.361597 |
| C    | 2.734060                | -1.024360 | -3.096134 |
| C    | 2.734591                | -2.168141 | 2.435596  |
| C    | 2.734353                | -0.919837 | 3.128616  |
| C    | 2.732731                | 3.170677  | -0.767353 |
| C    | 2.732875                | 3.194627  | 0.660248  |
| C    | 3.466221                | -3.350089 | -2.814549 |
| C    | 4.156389                | -3.231063 | -4.017397 |
| C    | 4.156131                | -2.022379 | -4.742515 |
| C    | 3.465685                | -0.905327 | -4.281221 |
| C    | 3.466681                | -3.253637 | 2.925085  |
| C    | 4.157064                | -3.094282 | 4.123133  |
| C    | 4.156833                | -1.861949 | 4.807287  |
| C    | 3.466206                | -0.761055 | 4.308896  |
| C    | 3.463768                | 4.114091  | -1.494932 |
| C    | 4.153522                | 5.096744  | -0.790662 |
| C    | 4.153661                | 5.120397  | 0.618634  |
| C    | 3.464058                | 4.161926  | 1.355620  |
| H    | 4.712424                | -4.080645 | -4.402921 |
| H    | 3.486225                | -4.270577 | -2.240264 |
| H    | 4.711956                | -1.962454 | -5.673676 |
| H    | 3.485225                | 0.034631  | -4.823072 |
| H    | 3.483485                | 4.076970  | -2.579245 |
| H    | 4.708898                | 5.855752  | -1.333852 |
| H    | 4.709135                | 5.897212  | 1.135934  |
| H    | 3.483982                | 4.161224  | 2.440566  |
| H    | 3.485864                | 0.196583  | 4.818842  |
| H    | 4.712886                | -1.770750 | 5.735768  |
| H    | 4.713286                | -3.930397 | 4.536804  |
| H    | 3.486677                | -4.192866 | 2.381989  |
| N    | -2.157638               | -1.278405 | 2.301858  |
| C    | -1.994350               | 0.053027  | 2.297623  |
| C    | -1.993741               | -1.978771 | 1.169597  |
| N    | -1.413070               | -1.480413 | 0.024887  |
| N    | -1.413384               | 0.761451  | 1.269672  |
| C    | -1.993877               | -2.016835 | -1.102422 |



|    |           |           |           |
|----|-----------|-----------|-----------|
| N  | -2.157810 | -1.354836 | -2.257531 |
| C  | -1.994449 | -0.024029 | -2.297998 |
| N  | -1.413350 | 0.718473  | -1.294466 |
| C  | -1.994925 | 2.001554  | 1.128609  |
| N  | -2.158878 | 2.631834  | -0.044101 |
| C  | -1.994913 | 1.962599  | -1.195023 |
| C  | -2.734186 | 1.024284  | 3.096154  |
| C  | -2.734521 | 2.248649  | 2.361646  |
| C  | -2.732569 | -3.170705 | 0.767279  |
| C  | -2.732683 | -3.194622 | -0.660321 |
| C  | -2.734662 | 2.168187  | -2.435554 |
| C  | -2.734337 | 0.919897  | -3.1286   |
| C  | -3.465824 | 0.905185  | 4.281226  |
| C  | -4.156341 | 2.022188  | 4.742534  |
| C  | -4.156651 | 3.23089   | 4.017444  |
| C  | -3.466467 | 3.349981  | 2.814612  |
| C  | -3.463559 | -4.11418  | 1.494822  |
| C  | -4.153238 | -5.096862 | 0.790517  |
| C  | -4.153348 | -5.120483 | -0.618778 |
| C  | -3.463791 | -4.16195  | -1.35573  |
| C  | -3.466801 | 3.253653  | -2.925039 |
| C  | -4.157148 | 3.094284  | -4.123106 |
| C  | -4.156831 | 1.861965  | -4.807285 |
| C  | -3.466153 | 0.761099  | -4.308901 |
| H  | -4.712178 | 1.96221   | 5.673683  |
| H  | -3.485323 | -0.034787 | 4.823055  |
| H  | -4.712739 | 4.080433  | 4.402977  |
| H  | -3.486511 | 4.270482  | 2.240349  |
| H  | -3.486862 | 4.192869  | -2.381924 |
| H  | -4.713407 | 3.930376  | -4.536772 |
| H  | -4.712857 | 1.770754  | -5.735782 |
| H  | -3.485745 | -0.196529 | -4.818869 |
| H  | -3.483693 | -4.161226 | -2.440675 |
| H  | -4.708762 | -5.89732  | -1.136109 |
| H  | -4.708577 | -5.855917 | 1.33368   |
| H  | -3.483301 | -4.077085 | 2.579137  |
| Tc | -0.000003 | 0.000076  | 0.000028  |

Re-Oc

---

| Atom | Coordinates (Angstroms) |
|------|-------------------------|
|------|-------------------------|

|   | X         | Y         | Z         |
|---|-----------|-----------|-----------|
| N | -2.161817 | -2.630696 | -0.082121 |
| C | -1.999000 | -2.017880 | 1.099899  |
| C | -1.999102 | -1.945297 | -1.223600 |
| N | -1.412924 | -0.699908 | -1.305535 |
| N | -1.412852 | -0.780015 | 1.259330  |
| C | -1.998986 | 0.057277  | -2.297787 |
| N | -2.161359 | 1.387407  | -2.237525 |
| C | -1.998211 | 2.033219  | -1.073264 |
| N | -1.412385 | 1.481115  | 0.046263  |
| C | -1.998843 | -0.086234 | 2.296937  |
| N | -2.161246 | 1.245060  | 2.319793  |
| C | -1.998174 | 1.962269  | 1.198088  |
| C | -2.742800 | -2.280574 | 2.326089  |
| C | -2.742701 | -1.067264 | 3.077965  |
| C | -2.742994 | -2.130957 | -2.463741 |
| C | -2.742954 | -0.873089 | -3.138435 |
| C | -2.741056 | 3.156152  | 0.812653  |
| C | -2.741035 | 3.200737  | -0.614043 |
| C | -3.479455 | -3.386533 | 2.759874  |
| C | -4.173785 | -3.283524 | 3.961782  |
| C | -4.173689 | -2.085466 | 4.704213  |
| C | -3.479248 | -0.963404 | 4.261484  |
| C | -3.479681 | -3.207692 | -2.965646 |
| C | -4.174115 | -3.029866 | -4.158720 |
| C | -4.174086 | -1.787806 | -4.824932 |
| C | -3.479605 | -0.695563 | -4.313100 |
| C | -3.476686 | 4.085517  | 1.553675  |
| C | -4.169948 | 5.075740  | 0.863649  |
| C | -4.169918 | 5.119770  | -0.545106 |
| C | -3.476634 | 4.174568  | -1.295599 |
| H | -4.733263 | -4.137303 | 4.332773  |
| H | -3.499488 | -4.298362 | 2.171971  |
| H | -4.733110 | -2.037632 | 5.633916  |
| H | -3.499140 | -0.031099 | 4.816350  |
| H | -3.496633 | 4.032275  | 2.637295  |
| H | -4.728488 | 5.824540  | 1.417651  |
| H | -4.728449 | 5.901697  | -1.051289 |
| H | -3.496568 | 4.189088  | -2.380430 |
| H | -3.499506 | 0.269542  | -4.808723 |
| H | -4.733559 | -1.682052 | -5.749807 |
| H | -4.733609 | -3.858834 | -4.582237 |
| H | -3.499653 | -4.154439 | -2.435804 |
| N | 2.161229  | -1.245076 | -2.319778 |
| C | 1.998894  | 0.086229  | -2.296951 |
| C | 1.998095  | -1.962257 | -1.198070 |
| N | 1.412315  | -1.481050 | -0.046262 |
| N | 1.412922  | 0.780062  | -1.259370 |
| C | 1.998076  | -2.033173 | 1.073287  |
| N | 2.161230  | -1.387354 | 2.237539  |
| C | 1.998928  | -0.057214 | 2.297781  |
| N | 1.412939  | 0.699992  | 1.305501  |
| C | 1.999151  | 2.017897  | -1.099941 |
| N | 2.161981  | 2.630710  | 0.082074  |
| C | 1.999196  | 1.945346  | 1.223562  |

|    |          |           |           |
|----|----------|-----------|-----------|
| C  | 2.742831 | 1.067200  | -3.077977 |
| C  | 2.742992 | 2.280521  | -2.326119 |
| C  | 2.740895 | -3.156184 | -0.812598 |
| C  | 2.740836 | -3.200749 | 0.614098  |
| C  | 2.743066 | 2.130977  | 2.463719  |
| C  | 2.742927 | 0.873120  | 3.138434  |
| C  | 3.479392 | 0.963276  | -4.261481 |
| C  | 4.173912 | 2.085287  | -4.704214 |
| C  | 4.174071 | 3.283356  | -3.961801 |
| C  | 3.479727 | 3.386426  | -2.759907 |
| C  | 3.476476 | -4.085609 | -1.553589 |
| C  | 4.169656 | -5.075870 | -0.863532 |
| C  | 4.169590 | -5.119880 | 0.545221  |
| C  | 3.476351 | -4.174619 | 1.295686  |
| C  | 3.479807 | 3.207674  | 2.965626  |
| C  | 4.174196 | 3.029825  | 4.158723  |
| C  | 4.174069 | 1.787776  | 4.824956  |
| C  | 3.479533 | 0.695568  | 4.313123  |
| H  | 4.733345 | 2.037402  | -5.633907 |
| H  | 3.499235 | 0.030961  | -4.816332 |
| H  | 4.733609 | 4.137095  | -4.332793 |
| H  | 3.499806 | 4.298265  | -2.172019 |
| H  | 3.499853 | 4.154413  | 2.435771  |
| H  | 4.733729 | 3.858765  | 4.582241  |
| H  | 4.733507 | 1.682001  | 5.749849  |
| H  | 3.499360 | -0.269530 | 4.808762  |
| H  | 3.496259 | -4.189126 | 2.380517  |
| H  | 4.728054 | -5.901836 | 1.051432  |
| H  | 4.728157 | -5.824715 | -1.417513 |
| H  | 3.496452 | -4.032386 | -2.637210 |
| Re | 0.000002 | 0.000072  | -0.000027 |
